# Supplementary material for: A Report on Multi-Target Anti-Inflammatory Properties of Phytoconstituents from Monochoria hastata (Family: Pontederiaceae)
Source: Molecules. 2021 Dec 6;26(23):7397. doi: 10.3390/molecules26237397 (PMC8658818; doi:10.3390/molecules26237397)
Supplement: Supplementary file 1 [file molecules-26-07397-s001.zip › molecules-1441258-supplementary.pdf]

## Supplementary Data

## Figures

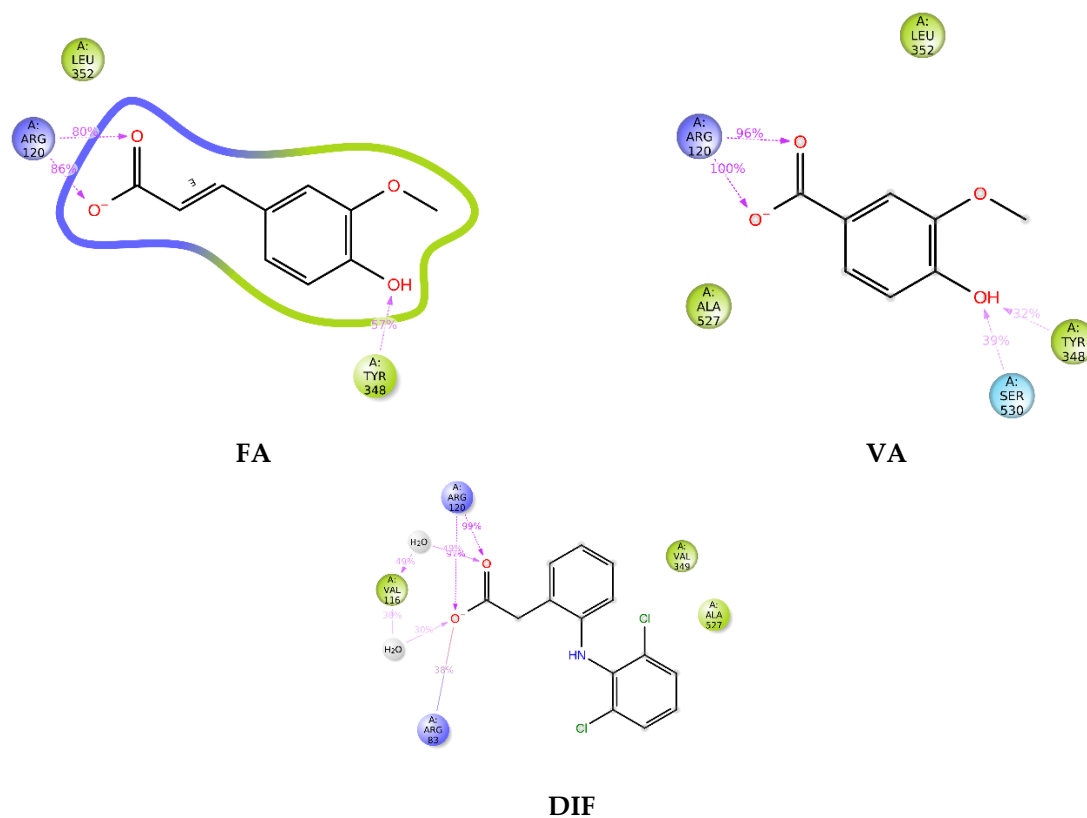

**Figure S1.** Non-bond ligand-protein interaction for COX-1 with FA, VA, and DIF after 100 ns molecular dynamics simulation. Interaction that occurs more than 30% in the trajectory.

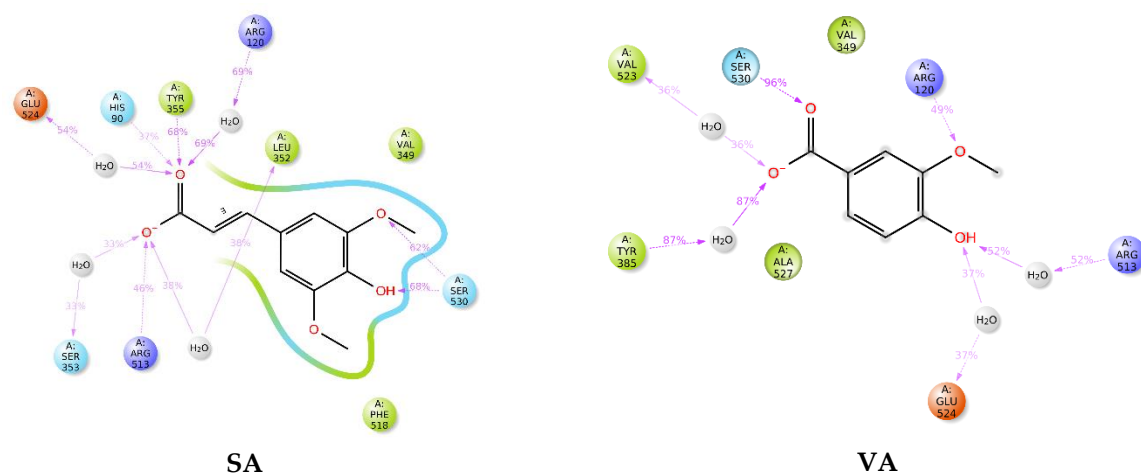

[2]

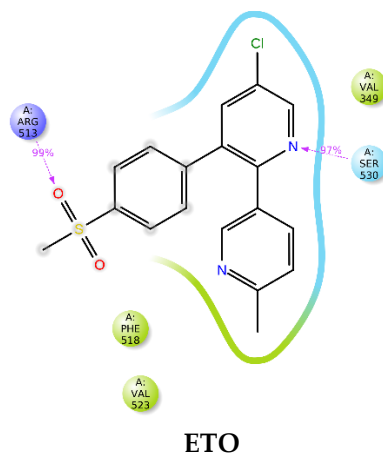

**Figure S2.** Non-bond ligand-protein interaction for COX-2 with VA, PA, SA, and control ETO after 100 ns molecular dynamics simulation. Interaction that occurs more than 30% in the trajectory.

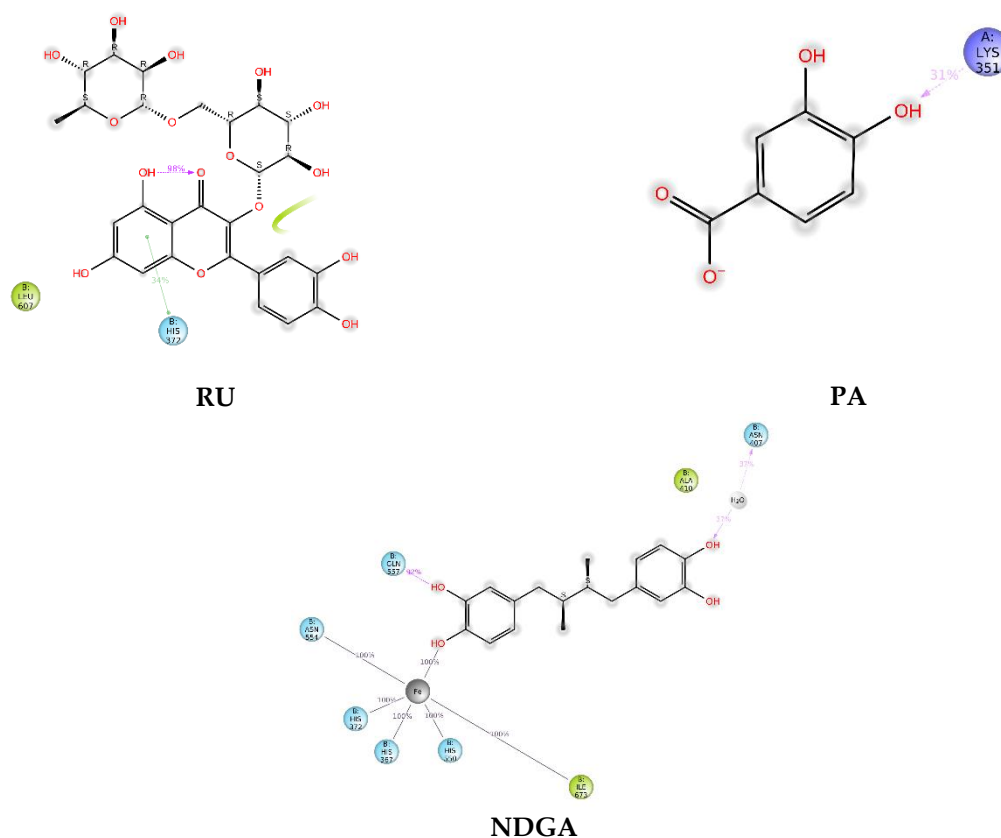

**Figure S3.** Non-bond ligand-protein interaction for LOX-5 with RU, PA, and control NDGA after 100 ns molecular dynamics simulation. Interaction that occurs more than 30% in the trajectory.

[3]

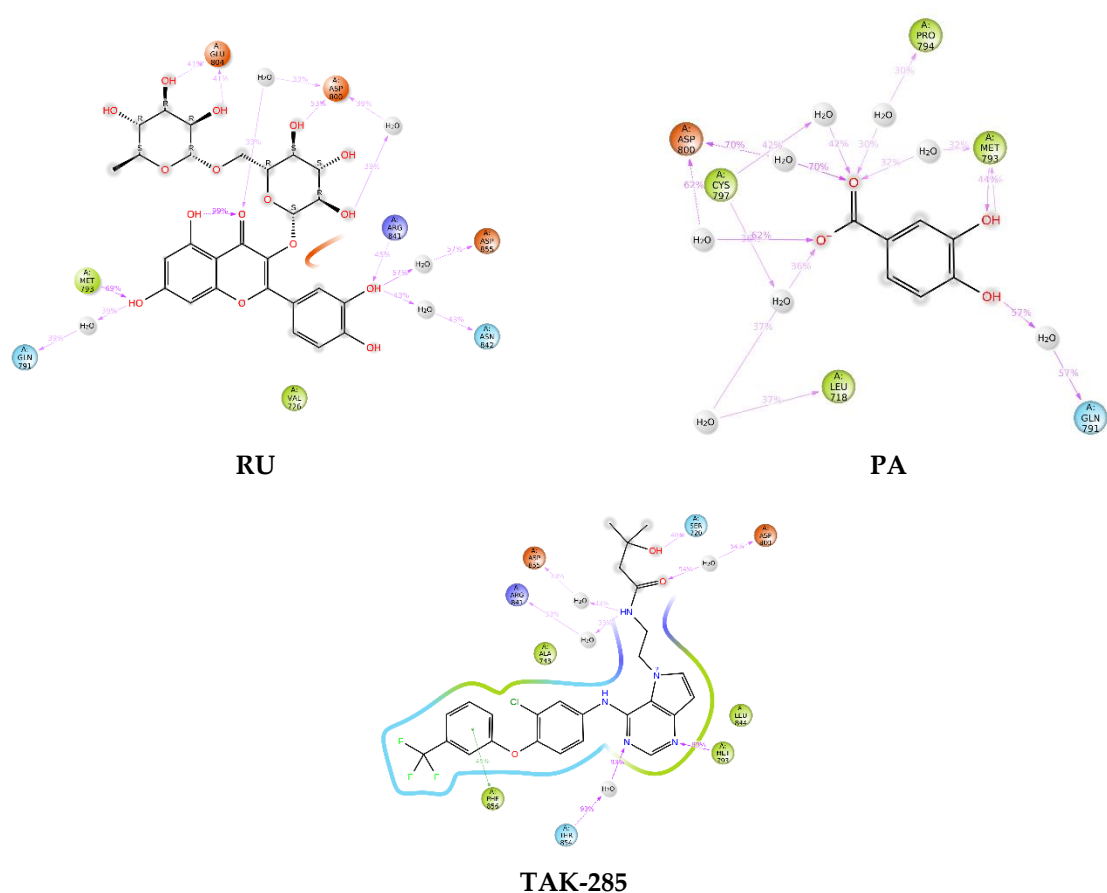

**Figure S4.** Non-bond ligand-protein interaction for EGFR with RU, PA, and control Tak-285 after 100 ns molecular dynamics simulation. Interaction that occurs more than 30% in the trajectory.

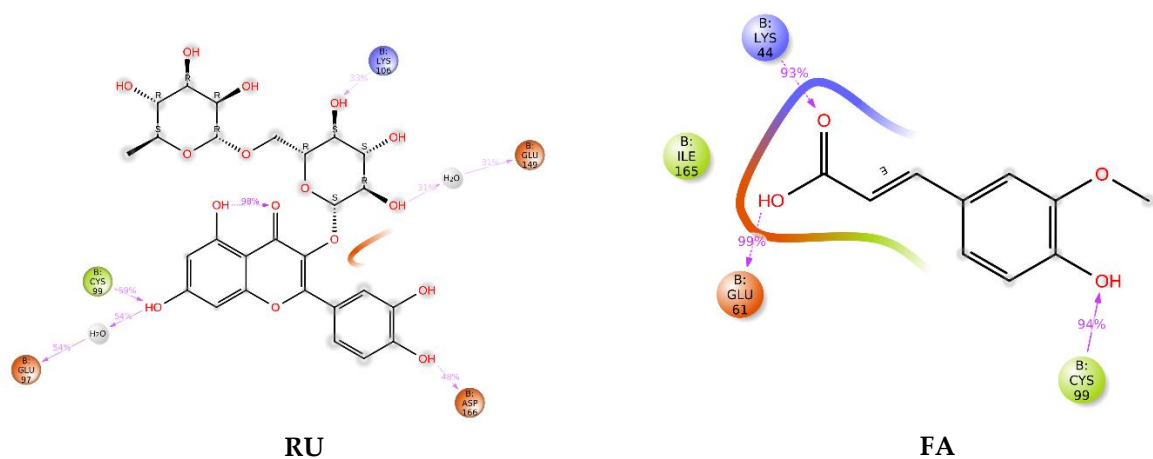

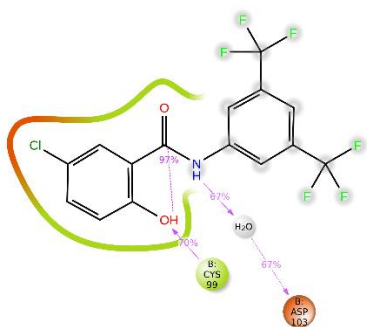

IMD

**Figure S5.** Non-bond ligand-protein interaction for IKK with RU, FA, and control IMD after 100 ns molecular dynamics simulation. Interaction that occurs more than 30% in the trajectory.

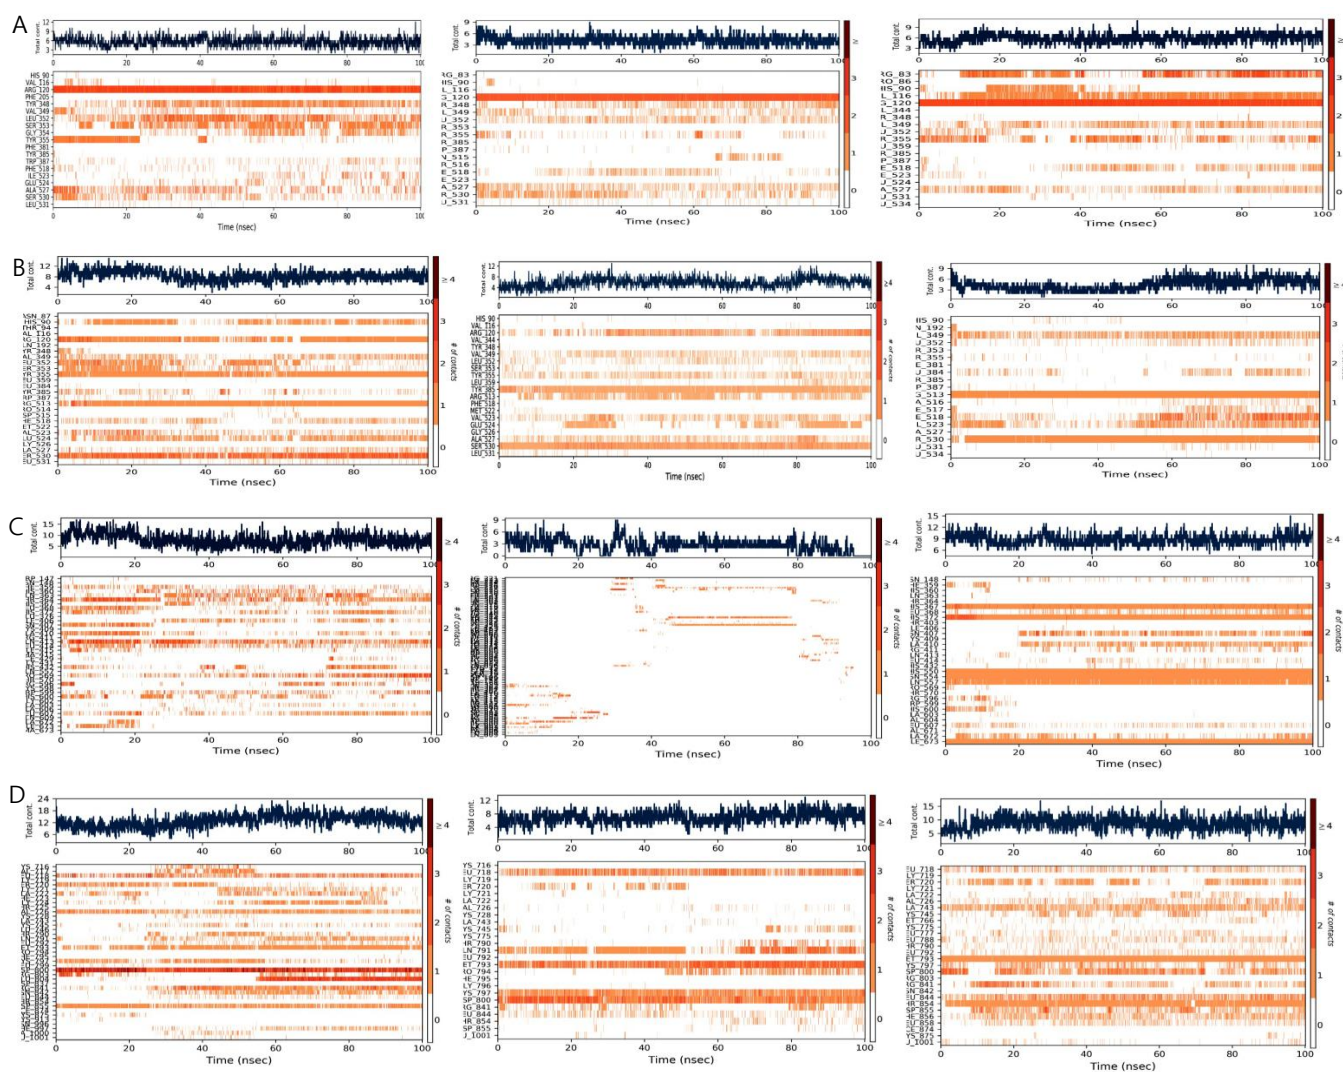

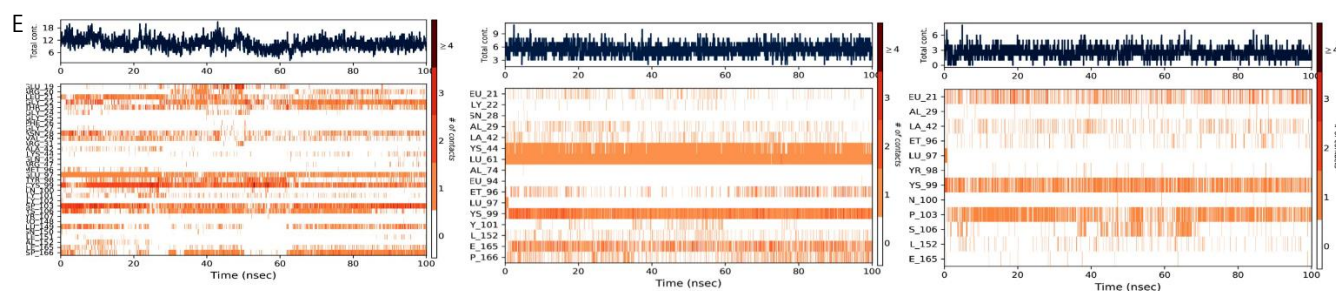

**Figure S6.** Per residue interaction timeline of the protein with the ligands in different time frame. Row A, B, C, D, and E represents the data of COX-1, COX-2, LOX-5, EGFR, and IKK respectively. A: (left to right) FA, VA, DIF; B: (left to right) SA, VA, ETO; C: (left to right) RU, PA, NDGA; D: (left to right) RU, PA, TAK-285; E: RU, FA, IMD.

## Tables

**Table S1.** Pharmacological activity prediction for the isolated compounds. Pa > 0.7 was selected

| Ferulic acid                                   | Sinapic acid                                   | Chlorogenic acid                 | p-Coumaric                                           | Rutin                                 | Syringic                                                              | Vanillic acid                                               | Protocatechuic                                                        |
|------------------------------------------------|------------------------------------------------|----------------------------------|------------------------------------------------------|---------------------------------------|-----------------------------------------------------------------------|-------------------------------------------------------------|-----------------------------------------------------------------------|
| Membrane integrity agonist                     | Feruloyl esterase inhibitor                    | Membrane integrity agonist       | Feruloyl esterase inhibitor                          | Hemostatic                            | Chlordecone reductase inhibitor                                       | Chlordecone reductase inhibitor                             | Chlordecone reductase inhibitor                                       |
| JAK2 expression inhibitor                      | Membrane integrity agonist                     | Choleretic                       | Membrane integrity agonist                           | Membrane permeability inhibitor       | Aspulvinone dimethylallyltransferase inhibitor                        | Aldehyde oxidase inhibitor                                  | Dehydro-L-gulonate decarboxylase inhibitor                            |
| Mucomembranous protector                       | Antimutagenic                                  | Membrane permeability inhibitor  | Benzoate 4-monooxygenase inhibitor                   | Free radical scavenger                | Ubiquinol-cytochrome-c reductase inhibitor                            | Feruloyl esterase inhibitor                                 | Arylacetonitrilase inhibitor                                          |
| Chlordecone reductase inhibitor                | JAK2 expression inhibitor                      | Free radical scavenger           | Mucomembranous protector                             | Cardioprotectant                      | 4-Methoxybenzoate monooxygenase (O-demethylating) inhibitor           | Aspulvinone dimethylallyltransferase inhibitor              | Glutathione thioesterase inhibitor                                    |
| Aryl sulfotransferase inhibitor                | Aspulvinone dimethylallyltransferase inhibitor | Lipid peroxidase inhibitor       | Catechol oxidase inhibitor                           | Lipid peroxidase inhibitor            | 2-Hydroxyquinoline 8-monooxygenase inhibitor                          | 2-Hydroxyquinoline 8-monooxygenase inhibitor                | Alkane 1-monooxygenase inhibitor                                      |
| Preneoplastic conditions treatment             | Preneoplastic conditions treatment             | Oxidoreductase inhibitor         | Chlordecone reductase inhibitor                      | Membrane integrity agonist            | Dehydro-L-gulonate decarboxylase inhibitor                            | Ubiquinol-cytochrome-c reductase inhibitor                  | Testosterone 17 $\beta$ -dehydrogenase (NADP <sup>+</sup> ) inhibitor |
| Antimutagenic                                  | Mucomembranous protector                       | Anticarcinogenic                 | Benzoylformate decarboxylase inhibitor               | CYP1A inducer                         | Testosterone 17 $\beta$ -dehydrogenase (NADP <sup>+</sup> ) inhibitor | Catechol 1,2-dioxygenase inhibitor                          | Threonine aldolase inhibitor                                          |
| Aspulvinone dimethylallyltransferase inhibitor | Chlordecone reductase inhibitor                | Chemopreventive                  | CYP2J substrate                                      | Anticarcinogenic                      | Taurine dehydrogenase inhibitor                                       | 4-Methoxybenzoate monooxygenase (O-demethylating) inhibitor | Sugar-phosphatase inhibitor                                           |
| Benzoate 4-monooxygenase inhibitor             | Benzoate 4-monooxygenase inhibitor             | HIF1A expression inhibitor       | Pyruvate decarboxylase inhibitor                     | Vasoprotector                         | Aldehyde oxidase inhibitor                                            | Dehydro-L-gulonate decarboxylase inhibitor                  | Arylsulfate sulfotransferase inhibitor                                |
| Mucositis treatment                            | Aryl sulfotransferase inhibitor                | Phosphatase inhibitor            | Antimutagenic                                        | CYP1A1 inducer                        | Feruloyl esterase inhibitor                                           | Shikimate 5-dehydrogenase inhibitor                         | Alkenylglycerophosphocholine hydrolase inhibitor                      |
| Linoleate diol synthase inhibitor              | Diphosphomevalonate decarboxylase inhibitor    | Anticarcinogenic                 | Protocatechuic 3,4-dioxygenase inhibitor             | Xanthine dehydrogenase inhibitor      | Catechol 1,2-dioxygenase inhibitor                                    | Arylacetonitrilase inhibitor                                | NADPH-cytochrome-c2 reductase inhibitor                               |
| MMP9 expression inhibitor                      | Ubiquinol-cytochrome-c reductase inhibitor     | Antioxidant                      | Aspulvinone dimethylallyltransferase inhibitor       | Hepatoprotectant                      | Sugar-phosphatase inhibitor                                           | Preneoplastic conditions treatment                          | Glucan endo-1,6- $\beta$ -glucosidase inhibitor                       |
| Choleretic                                     | 4-Coumarate-CoA ligase inhibitor               | Proliferative diseases treatment | 3,4-Dihydroxyphenylacetate 2,3-dioxygenase inhibitor | Chemopreventive                       | NADPH-cytochrome-c2 reductase inhibitor                               | Taurine dehydrogenase inhibitor                             | 2-Hydroxyquinoline 8-monooxygenase inhibitor                          |
| 4-Coumarate-CoA ligase inhibitor               | MMP9 expression inhibitor                      | Antineoplastic                   | Threonine aldolase inhibitor                         | UDP-glucuronosyltransferase substrate | Glutathione thioesterase inhibitor                                    | Glutathione thioesterase inhibitor                          | Monodehydroascorbate reductase (NADH) inhibitor                       |
| Ubiquinol-cytochrome-c                         | Monophenol monooxygenase inhibitor             | Feruloyl esterase inhibitor      | GST A substrate                                      | Monophenol monooxygenase inhibitor    | Alkane 1-monooxygenase inhibitor                                      | Vanillyl-alcohol oxidase inhibitor                          | Catechol 1,2-dioxygenase inhibitor                                    |

|                                                        |                                                        |                                                  |                                                                  |                                                  |                                                         |                                                       |                                                                  |
|--------------------------------------------------------|--------------------------------------------------------|--------------------------------------------------|------------------------------------------------------------------|--------------------------------------------------|---------------------------------------------------------|-------------------------------------------------------|------------------------------------------------------------------|
| reductase inhibitor                                    |                                                        |                                                  |                                                                  |                                                  |                                                         |                                                       |                                                                  |
| Vanillyl-alcohol oxidase inhibitor                     | Mucositis treatment                                    | Quinate 5-dehydrogenase inhibitor                | GABA aminotransferase inhibitor                                  | Proliferative diseases treatment                 | Arylacetonitrilase inhibitor                            | Alkane 1-monoxygenase inhibitor                       | Ribulose-phosphate 3-epimerase inhibitor                         |
| Gluconate 2-dehydrogenase (acceptor) inhibitor         | Gluconate 2-dehydrogenase (acceptor) inhibitor         | Antihypoxic                                      | Antiseborrheic                                                   | Histamine release stimulant                      | Methylenetetrahydrofolate reductase (NADPH) inhibitor   | Testosterone 17beta-dehydrogenase (NADP+) inhibitor   | Glutamyl endopeptidase II inhibitor                              |
| Protocatechuate 3,4-dioxygenase inhibitor              | Beta-carotene 15,15'-monoxygenase inhibitor            | Mucomembranous protector                         | JAK2 expression inhibitor                                        | Morphine 6-dehydrogenase inhibitor               | Ribulose-phosphate 3-epimerase inhibitor                | Antiseptic                                            | Cis-1,2-dihydro-1,2-dihydroxynaphthalene dehydrogenase inhibitor |
| Beta-carotene 15,15'-monoxygenase inhibitor            | CYP2J substrate                                        | 4-Coumarate-CoA ligase inhibitor                 | Diphosphomevalonate decarboxylase inhibitor                      | Capillary fragility treatment                    | Superoxide dismutase inhibitor                          | Fibrinolytic                                          | Methylenetetrahydrofolate reductase (NADPH) inhibitor            |
| HIF1A expression inhibitor                             | Catechol oxidase inhibitor                             | G-protein-coupled receptor kinase inhibitor      | 4-Hydroxybenzoate 3-monoxygenase inhibitor                       | Anaphylatoxin receptor antagonist                | Arylsulfate sulfotransferase inhibitor                  | Sugar-phosphatase inhibitor                           | UDP-N-acetylglucosamine 4-epimerase inhibitor                    |
| TNF expression inhibitor                               | Fumarate reductase (NADH) inhibitor                    | Beta-adrenergic receptor kinase inhibitor        | NADPH peroxidase inhibitor                                       | Antioxidant                                      | Glucan endo-1,6-beta-glucosidase inhibitor              | Vanillyl-alcohol oxidase inhibitor                    | Taurine dehydrogenase inhibitor                                  |
| Membrane permeability inhibitor                        | Choleretic                                             | UDP-glucuronosyltransferase substrate            | Ubiquinol-cytochrome-c reductase inhibitor                       | CDP-glycerol glycerophosphotransferase inhibitor | UDP-N-acetylglucosamine 4-epimerase inhibitor           | Alkenylglycerophosphocholine hydrolase inhibitor      | Corticosteroid side-chain-isomerase inhibitor                    |
| Fumarate reductase (NADH) inhibitor                    | 3-Demethylubiquinone-9 3-O-methyltransferase inhibitor | CDP-glycerol glycerophosphotransferase inhibitor | Dehydro-L-gulonate decarboxylase inhibitor                       | Antiprotozoal (Leishmania)                       | Fusarinine-C ornithinesterase inhibitor                 | Methylenetetrahydrofolate reductase (NADPH) inhibitor | Prolyl aminopeptidase inhibitor                                  |
| 2-Hydroxyquinoline 8-monoxygenase inhibitor            | Carminative                                            |                                                  | NADPH-cytochrome-c2 reductase inhibitor                          | Antihypercholesterolemic                         | Threonine aldolase inhibitor                            | Threonine aldolase inhibitor                          | Aspartate-phenylpyruvate transaminase inhibitor                  |
| Carminative                                            | TP53 expression enhancer                               |                                                  | Phosphatidylcholine-retinol O-acyltransferase inhibitor          | TP53 expression enhancer                         | Alkenylglycerophosphocholine hydrolase inhibitor        | Arylsulfate sulfotransferase inhibitor                | Pullulanase inhibitor                                            |
| Catechol oxidase inhibitor                             | HMOX1 expression enhancer                              |                                                  | Preneoplastic conditions treatment                               | Antidote                                         | Alkenylglycerophosphocholine hydrolase inhibitor        | Catechol 2,3-dioxygenase inhibitor                    | 2-Nitropropane dioxygenase inhibitor                             |
| CYP2J substrate                                        | Membrane permeability inhibitor                        |                                                  | Mucositis treatment                                              | UGT1A substrate                                  | Fatty-acyl-CoA synthase inhibitor                       | Glucan endo-1,6-beta-glucosidase inhibitor            | Aldehyde oxidase inhibitor                                       |
| TP53 expression enhancer                               | GST A substrate                                        |                                                  | CYP4A11 substrate                                                | Alpha glucosidase inhibitor                      | Shikimate 5-dehydrogenase inhibitor                     | Superoxide dismutase inhibitor                        | Fatty-acyl-CoA synthase inhibitor                                |
| Insulysin inhibitor                                    | Linoleate diol synthase inhibitor                      |                                                  | Arylsulfate sulfotransferase inhibitor                           | Aryl hydrocarbon receptor agonist                | Spermidine dehydrogenase inhibitor                      | Ribulose-phosphate 3-epimerase inhibitor              | Catechol 2,3-dioxygenase inhibitor                               |
| HMOX1 expression enhancer                              | Eye irritation, inactive                               |                                                  | Fumarate reductase (NADH) inhibitor                              | 2-Dehydropantoate 2-reductase inhibitor          | Antiseptic                                              | Membrane integrity agonist                            | Dextranase inhibitor                                             |
| 3-Demethylubiquinone-9 3-O-methyltransferase inhibitor | TNF expression inhibitor                               |                                                  | Cis-1,2-dihydro-1,2-dihydroxynaphthalene dehydrogenase inhibitor | Beta-N-acetylhexosaminidase inhibitor            | N-acylmannosamine kinase inhibitor                      | JAK2 expression inhibitor                             | Ubiquinol-cytochrome-c reductase inhibitor                       |
| Antiseptic                                             | HIF1A expression inhibitor                             |                                                  | Alkenylglycerophosphocholine hydrolase inhibitor                 | CYP3A4 inducer                                   | Glutamyl endopeptidase II inhibitor                     | Linoleate diol synthase inhibitor                     | Gamma-guanidinobutyraldehyde dehydrogenase inhibitor             |
| GST A substrate                                        | 2-Hydroxyquinoline 8-monoxygenase inhibitor            |                                                  | Glutathione thiolesterase inhibitor                              | NADPH oxidase inhibitor                          | Nitrate reductase (cytochrome) inhibitor                | Fusarinine-C ornithinesterase inhibitor               | Aspulvinone dimethylallyltransferase inhibitor                   |
| Fibrinolytic                                           | NADPH peroxidase inhibitor                             |                                                  | CYP2J2 substrate                                                 | Benzoate-CoA ligase inhibitor                    | Prolyl aminopeptidase inhibitor                         | UDP-N-acetylglucosamine 4-epimerase inhibitor         | Benzoate 4-monoxygenase inhibitor                                |
| Sulfotransferase substrate                             | Insulysin inhibitor                                    |                                                  | Arylacetonitrilase inhibitor                                     | Antineoplastic                                   | 5-O-(4-coumaroyl)-D-quininate 3'-monoxygenase inhibitor | Spermidine dehydrogenase inhibitor                    | Sulfite reductase inhibitor                                      |

|                                                        |                                         |  |                                                       |                                                           |                                                                  |                                                                  |                                                                            |
|--------------------------------------------------------|-----------------------------------------|--|-------------------------------------------------------|-----------------------------------------------------------|------------------------------------------------------------------|------------------------------------------------------------------|----------------------------------------------------------------------------|
| Eye irritation, inactive                               | Antiseptic                              |  | Gluconate 2-dehydrogenase (acceptor) inhibitor        | Caspase 3 stimulant                                       | Pullulanase inhibitor                                            | Beta-carotene 15,15'-monooxygenase inhibitor                     | Phloroglucinol reductase inhibitor                                         |
| Monophenol monooxygenase inhibitor                     | Antihypoxic                             |  | Corticosteroid side-chain-isomerase inhibitor         | HIF1A expression inhibitor                                | Aspartate-phenylpyruvate transaminase inhibitor                  | Fructose 5-dehydrogenase inhibitor                               | Feruloyl esterase inhibitor                                                |
| Vasoprotector                                          | Free radical scavenger                  |  | 3-Phytase inhibitor                                   | CYP2C9 inducer                                            | Amine dehydrogenase inhibitor                                    | Glutamyl endopeptidase II inhibitor                              | 2-Dehydropantoate 2-reductase inhibitor                                    |
| Caspase 3 stimulant                                    | CYP2A6 substrate                        |  | APOA1 expression enhancer                             | CYP3A inducer                                             | Fructose 5-dehydrogenase inhibitor                               | Amine dehydrogenase inhibitor                                    | Bisphosphoglycerate phosphatase inhibitor                                  |
| Steroid N-acetylglucosaminyltransferase inhibitor      | Apoptosis agonist                       |  | Fatty-acyl-CoA synthase inhibitor                     | Kinase inhibitor                                          | 4-Nitrophenol 2-monooxygenase inhibitor                          | Cis-1,2-dihydro-1,2-dihydroxynaphthalene dehydrogenase inhibitor | Alcohol oxidase inhibitor                                                  |
| Antieczematic                                          | Peroxidase inhibitor                    |  | Monophenol monooxygenase inhibitor                    | Lactase inhibitor                                         | Arginine 2-monooxygenase inhibitor                               | Fatty-acyl-CoA synthase inhibitor                                | 4-Methoxybenzoate monooxygenase (O-demethylating) inhibitor                |
| Benzoylformate decarboxylase inhibitor                 | NADPH-cytochrome-c2 reductase inhibitor |  | Aspartate-phenylpyruvate transaminase inhibitor       | CYP2H substrate                                           | Monodehydroascorbate reductase (NADH) inhibitor                  | Nitrate reductase (cytochrome) inhibitor                         | Glucose oxidase inhibitor                                                  |
| CYP2E1 inducer                                         | Pyruvate decarboxylase inhibitor        |  | G-protein-coupled receptor kinase inhibitor           | Chlordecone reductase inhibitor                           | Beta-carotene 15,15'-monooxygenase inhibitor                     | Prolyl aminopeptidase inhibitor                                  | Arginine 2-monooxygenase inhibitor                                         |
| Antihypoxic                                            | Fibrinolytic                            |  | Beta-adrenergic receptor kinase inhibitor             | P-benzoquinone reductase (NADPH) inhibitor                | Antieczematic                                                    | 5-O-(4-coumaroyl)-D-quininate 3'-monooxygenase inhibitor         | Aminobutyraldehyde dehydrogenase inhibitor                                 |
| Free radical scavenger                                 | Antieczematic                           |  | MMP9 expression inhibitor                             | Antifungal                                                | Aldehyde dehydrogenase (pyroloquinoline-quinone) inhibitor       | N-acylmannosamine kinase inhibitor                               | 5-O-(4-coumaroyl)-D-quininate 3'-monooxygenase inhibitor                   |
| GABA aminotransferase inhibitor                        | Benzoylformate decarboxylase inhibitor  |  | Testosterone 17beta-dehydrogenase (NADP+) inhibitor   | Laxative                                                  | Peroxidase inhibitor                                             | 4-Nitrophenol 2-monooxygenase inhibitor                          | Sphinganine kinase inhibitor                                               |
| Shikimate 5-dehydrogenase inhibitor                    | GABA aminotransferase inhibitor         |  | 2-Hydroxyquinoline 8-monooxygenase inhibitor          | Mycotoxinol-S-conjugate amidase inhibitor                 | 4-Hydroxyproline epimerase inhibitor                             | Corticosteroid side-chain-isomerase inhibitor                    | Aryl-alcohol dehydrogenase (NADP+) inhibitor                               |
| UDP-glucuronosyltransferase substrate                  | UDP-glucuronosyltransferase substrate   |  | Linoleate diol synthase inhibitor                     | Trans-1,2-dihydrobenzene-1,2-diol dehydrogenase inhibitor | Anaphylatoxin receptor antagonist                                | Arginine 2-monooxygenase inhibitor                               | NADH kinase inhibitor                                                      |
| APOA1 expression enhancer                              | Vasoprotector                           |  | 4-Coumarate-CoA ligase inhibitor                      | Beta glucuronidase inhibitor                              | Vanillyl-alcohol oxidase inhibitor                               | Pullulanase inhibitor                                            | Sulfite oxidase inhibitor                                                  |
| Antiseborrheic                                         | CYP2A substrate                         |  | Methylenetetrahydrofolate reductase (NADPH) inhibitor | Skin whitener                                             | Corticosteroid side-chain-isomerase inhibitor                    | Aminomuconate-semialdehyde dehydrogenase inhibitor               | Superoxide dismutase inhibitor                                             |
| Pyruvate decarboxylase inhibitor                       | Saccharopeptin inhibitor                |  | HIF1A expression inhibitor                            | HMOX1 expression enhancer                                 | Cis-1,2-dihydro-1,2-dihydroxynaphthalene dehydrogenase inhibitor | Aspartate-phenylpyruvate transaminase inhibitor                  | Peptide alpha-N-acetyltransferase inhibitor                                |
| 1-Acylglycerol-3-phosphate O-acyltransferase inhibitor | Acrolyndropepsin inhibitor              |  | Beta-carotene 15,15'-monooxygenase inhibitor          | Membrane integrity antagonist                             | Dextranase inhibitor                                             | NADPH-ferrihemoprotein reductase inhibitor                       | Phosphatidylcholine-retinol O-acyltransferase inhibitor                    |
| Reductant                                              | Chymosin inhibitor                      |  | Sulfite reductase inhibitor                           | NADPH-ferrihemoprotein reductase inhibitor                | Bisphosphoglycerate phosphatase inhibitor                        | 2-Nitropropane dioxygenase inhibitor                             | Glyoxylate oxidase inhibitor                                               |
| Cytoprotectant                                         | CYP2J2 substrate                        |  | Membrane permeability inhibitor                       | Glutathione-disulfide reductase inhibitor                 | 3-Hydroxybenzoate 6-monooxygenase inhibitor                      | Monodehydroascorbate reductase (NADH) inhibitor                  | Antiseptic                                                                 |
| Acrolyndropepsin inhibitor                             | Antiseborrheic                          |  | Phenylpyruvate decarboxylase inhibitor                | Antiviral (Influenza)                                     | Fibrinolytic                                                     | Peroxidase inhibitor                                             | Magnesium-protoporphyrin IX monomethyl ester (oxidative) cyclase inhibitor |
| Chymosin inhibitor                                     | Phobic disorders treatment              |  | Pullulanase inhibitor                                 | Radiosensitizer                                           | Creatininase inhibitor                                           | 2-Dehydropantoate 2-reductase inhibitor                          | Membrane integrity agonist                                                 |

|                                                       |  |  |                                                                            |                                          |                                                            |                                                             |                                                            |
|-------------------------------------------------------|--|--|----------------------------------------------------------------------------|------------------------------------------|------------------------------------------------------------|-------------------------------------------------------------|------------------------------------------------------------|
| MAP kinase stimulant                                  |  |  | Prephenate dehydrogenase inhibitor                                         | Apoptosis agonist                        | JAK2 expression inhibitor                                  | Antimutagenic                                               | 3-Hydroxybenzoate 4-monooxygenase inhibitor                |
| Saccharopepsin inhibitor                              |  |  | Peptide alpha-N-acetyltransferase inhibitor                                | Vasodilator                              | Sulfite reductase inhibitor                                | Aryl-alcohol dehydrogenase inhibitor                        | 3-Hydroxybenzoate 6-monooxygenase inhibitor                |
| Peroxidase inhibitor                                  |  |  | Carminative                                                                | 4-Coumarate-CoA ligase inhibitor         | Phosphatidylcholine-retinol O-acyltransferase inhibitor    | Aldehyde dehydrogenase (pyrroloquinoline-quinone) inhibitor | 2,5-Dihydroxypyridine 5,6-dioxygenase inhibitor            |
| 3,4-Dihydroxyphenyl acetate 2,3-dioxygenase inhibitor |  |  | Sugar-phosphatase inhibitor                                                | Histidine kinase inhibitor               | NADH kinase inhibitor                                      | Membrane permeability inhibitor                             | Procollagen-lysine 5-dioxygenase inhibitor                 |
| 4-Hydroxybenzoate 3-monooxygenase inhibitor           |  |  | CYP2C12 substrate                                                          | Xenobiotic-transporting ATPase inhibitor | Pro-opiomelanocortin converting enzyme inhibitor           | Procollagen-lysine 5-dioxygenase inhibitor                  | Hyponitrite reductase inhibitor                            |
| Apoptosis agonist                                     |  |  | Vanillyl-alcohol oxidase inhibitor                                         | Radioprotector                           | Gamma-guanidinobutyraldehyde dehydrogenase inhibitor       | Aminobutyraldehyde dehydrogenase inhibitor                  | NADPH-ferrihemoprotein reductase inhibitor                 |
| NADPH-cytochrome-c2 reductase inhibitor               |  |  | Antihypoxic                                                                | Antiinflammatory                         | Aminobutyraldehyde dehydrogenase inhibitor                 | Dextranase inhibitor                                        | Anthranilate 3-monooxygenase (deaminating) inhibitor       |
|                                                       |  |  | Alkane 1-monooxygenase inhibitor                                           | Cytostatic                               | Nicotinate dehydrogenase inhibitor                         | Trans-acenaphthene-1,2-diol dehydrogenase inhibitor         | 2-Hydroxymuconate-semialdehyde hydrolase inhibitor         |
|                                                       |  |  | 2-Dehydropantoate 2-reductase inhibitor                                    | UGT1A7 substrate                         | Glucose oxidase inhibitor                                  | 4-Hydroxyproline epimerase inhibitor                        | Fusarinine-C ornithinesterase inhibitor                    |
|                                                       |  |  | Glucose oxidase inhibitor                                                  | Hepatic disorders treatment              | Vanillyl-alcohol oxidase inhibitor                         | Sulfite reductase inhibitor                                 | Creatininase inhibitor                                     |
|                                                       |  |  | 6-Pyruvoyltetrahydropterin synthase inhibitor                              | Nitric oxide antagonist                  | Antimutagenic                                              | Sphinganine kinase inhibitor                                | N-benzoyloxycarbonylglycine hydrolase inhibitor            |
|                                                       |  |  | HMOX1 expression enhancer                                                  |                                          | Peptide alpha-N-acetyltransferase inhibitor                | Gamma-guanidinobutyraldehyde dehydrogenase inhibitor        | Dimethylargininase inhibitor                               |
|                                                       |  |  | Chorismate mutase inhibitor                                                |                                          | Sphinganine kinase inhibitor                               | Bisphosphoglycerate phosphatase inhibitor                   | Protocatechuate 3,4-dioxygenase inhibitor                  |
|                                                       |  |  | 2-Enoate reductase inhibitor                                               |                                          | 2-Hydroxymuconate-semialdehyde hydrolase inhibitor         | Glucose oxidase inhibitor                                   | Trans-acenaphthene-1,2-diol dehydrogenase inhibitor        |
|                                                       |  |  | Protein-disulfide reductase (glutathione) inhibitor                        |                                          | Aryl-alcohol dehydrogenase inhibitor                       | Nicotinate dehydrogenase inhibitor                          | Taurocyamine kinase inhibitor                              |
|                                                       |  |  | NADH kinase inhibitor                                                      |                                          | Glutamate-5-semialdehyde dehydrogenase inhibitor           | Mucositis treatment                                         | Opheline kinase inhibitor                                  |
|                                                       |  |  | Magnesium-protoporphyrin IX monomethyl ester (oxidative) cyclase inhibitor |                                          | Urethanase inhibitor                                       | Glyoxylate oxidase inhibitor                                | Methylamine-glutamate N-methyltransferase inhibitor        |
|                                                       |  |  | Vanillyl-alcohol oxidase inhibitor                                         |                                          | tRNA-pseudouridine synthase I inhibitor                    | Peptide alpha-N-acetyltransferase inhibitor                 | Chenodeoxycholate/taurine hydrolase inhibitor              |
|                                                       |  |  | Arginine 2-monooxygenase inhibitor                                         |                                          | 2-Nitropropane dioxygenase inhibitor                       | Diphosphomevalonate decarboxylase inhibitor                 | Glutamine-phenylpyruvate transaminase inhibitor            |
|                                                       |  |  | Sphinganine kinase inhibitor                                               |                                          | Hyponitrite reductase inhibitor                            | Urethanase inhibitor                                        | Electron-transferring-flavoprotein dehydrogenase inhibitor |
|                                                       |  |  | GABA C receptor agonist                                                    |                                          | Membrane integrity agonist                                 | Aryl-alcohol dehydrogenase (NADP+) inhibitor                | Rhamnulose-1-phosphate aldolase inhibitor                  |
|                                                       |  |  | Acrocylindropepsin inhibitor                                               |                                          | Electron-transferring-flavoprotein dehydrogenase inhibitor | 3-Hydroxybenzoate 6-monooxygenase inhibitor                 | Gentisate 1,2-dioxygenase inhibitor                        |
|                                                       |  |  | Chymosin inhibitor                                                         |                                          | Dimethylargininase inhibitor                               | Phosphatidylcholine-retinol O-                              | L-glucuronate reductase inhibitor                          |

|  |  |  |                                                        |  |                                                        |                                                             |                                                             |
|--|--|--|--------------------------------------------------------|--|--------------------------------------------------------|-------------------------------------------------------------|-------------------------------------------------------------|
|  |  |  |                                                        |  |                                                        | acyltransferase inhibitor                                   |                                                             |
|  |  |  | Saccharopepsin inhibitor                               |  | Benzoate-CoA ligase inhibitor                          | 4-Coumarate-CoA ligase inhibitor                            | Polyamine-transporting ATPase inhibitor                     |
|  |  |  | Dextranase inhibitor                                   |  | Methylamine-glutamate N-methyltransferase inhibitor    | NADH kinase inhibitor                                       | Nitrate reductase (cytochrome) inhibitor                    |
|  |  |  | Choleretic                                             |  | Glutamine-phenylpyruvate transaminase inhibitor        | UGT1A6 substrate                                            | 2,6-Dihydroxypyridine 3-monooxygenase inhibitor             |
|  |  |  | Carboxypeptidase Taq inhibitor                         |  | Exoribonuclease II inhibitor                           | Nicotine dehydrogenase inhibitor                            | Crotonoyl-[acyl-carrier-protein] hydratase inhibitor        |
|  |  |  | TP53 expression enhancer                               |  | Phosphatidylserine decarboxylase inhibitor             | Phosphatidylserine decarboxylase inhibitor                  | Long-chain-aldehyde dehydrogenase inhibitor                 |
|  |  |  | Lipid metabolism regulator                             |  | Polyamine-transporting ATPase inhibitor                | Pro-opiomelanocortin converting enzyme inhibitor            | Glucan endo-1,3-beta-D-glucosidase inhibitor                |
|  |  |  | Phenylalanine dehydrogenase inhibitor                  |  | Gluconate 5-dehydrogenase inhibitor                    | Glutamate-5-semialdehyde dehydrogenase inhibitor            | Phosphatidylserine decarboxylase inhibitor                  |
|  |  |  | Reductant                                              |  | Glyoxylate oxidase inhibitor                           | tRNA-pseudouridine synthase I inhibitor                     | Cyclohexyl-isocyanide hydratase inhibitor                   |
|  |  |  | Glucan endo-1,6-beta-glucosidase inhibitor             |  | Chenodeoxycholate urine hydrolase inhibitor            | Steroid N-acetylglucosaminyltransferase inhibitor           | Gluconate 5-dehydrogenase inhibitor                         |
|  |  |  | Insulysin inhibitor                                    |  | Procollagen-lysine 5-dioxygenase inhibitor             | Nitrite reductase [NAD(P)H] inhibitor                       | N-acetylneuraminase synthase inhibitor                      |
|  |  |  | Ribulose-phosphate 3-epimerase inhibitor               |  | L-glutamate oxidase inhibitor                          | Hyponitrite reductase inhibitor                             | Phenylpyruvate decarboxylase inhibitor                      |
|  |  |  | Phobic disorders treatment                             |  | Lactaldehyde reductase inhibitor                       | 2-Hydroxymuconate-semialdehyde hydrolase inhibitor          | L-glutamate oxidase inhibitor                               |
|  |  |  | Glycosylphosphatidylinositol phospholipase D inhibitor |  | Nicotine dehydrogenase inhibitor                       | Creatininase inhibitor                                      | N-acetylneuraminase 7-O(or 9-O)-acetyltransferase inhibitor |
|  |  |  | NADPH-ferrihemoprotein reductase inhibitor             |  | Sarcosine oxidase inhibitor                            | Benzoate 4-monooxygenase inhibitor                          | Pterin deaminase inhibitor                                  |
|  |  |  | Glutamine-phenylpyruvate transaminase inhibitor        |  | (R)-Pantolactone dehydrogenase (flavin) inhibitor      | Long-chain-aldehyde dehydrogenase inhibitor                 | S-alkylcysteine lyase inhibitor                             |
|  |  |  | Glutamyl endopeptidase II inhibitor                    |  | Crotonoyl-[acyl-carrier-protein] hydratase inhibitor   | Phloroglucinol reductase inhibitor                          | Pyruvate decarboxylase inhibitor                            |
|  |  |  | Methylamine-glutamate N-methyltransferase inhibitor    |  | Membrane permeability inhibitor                        | Electron-transferring-flavoprotein dehydrogenase inhibitor  | N-methylhydantoinase (ATP-hydrolysing) inhibitor            |
|  |  |  | Manganese peroxidase inhibitor                         |  | Opheline kinase inhibitor                              | Antiseborrheic                                              | tRNA-pseudouridine synthase I inhibitor                     |
|  |  |  | Dimethylargininase inhibitor                           |  | Taurocyamine kinase inhibitor                          | CYP2C12 substrate                                           | Vanillyl-alcohol oxidase inhibitor                          |
|  |  |  | Phosphatidylserine decarboxylase inhibitor             |  | 3-Demethylubiquinone-9 3-O-methyltransferase inhibitor | 3-Demethylubiquinone-9 3-O-methyltransferase inhibitor      | N-Acyl-D-aspartate deacylase inhibitor                      |
|  |  |  | Fibrinolytic                                           |  | Formaldehyde transketolase inhibitor                   | 1,4-Lactonase inhibitor                                     | Spermidine dehydrogenase inhibitor                          |
|  |  |  | Phthalate 4,5-dioxygenase inhibitor                    |  | 2-Dehydropantoate 2-reductase inhibitor                | 2,6-Dihydroxypyridine 3-monooxygenase inhibitor             | Mucinaminylserine mucinaminidase inhibitor                  |
|  |  |  | Allyl-alcohol dehydrogenase inhibitor                  |  | Sulfite oxidase inhibitor                              | N-acetylneuraminase 7-O(or 9-O)-acetyltransferase inhibitor | Ferredoxin-NAD+ reductase inhibitor                         |

|  |  |  |                                                  |  |                                                             |                                                      |                                                             |
|--|--|--|--------------------------------------------------|--|-------------------------------------------------------------|------------------------------------------------------|-------------------------------------------------------------|
|  |  |  | Leukotriene-B4 20-monooxygenase inhibitor        |  | Pterin deaminase inhibitor                                  | Taurocyamine kinase inhibitor                        | Naphthalene 1,2-dioxygenase inhibitor                       |
|  |  |  | TNF expression inhibitor                         |  | ADP-thymidine kinase inhibitor                              | Opheline kinase inhibitor                            | N-acylmannosamine kinase inhibitor                          |
|  |  |  | Mucinaminyserine mucinaminidase inhibitor        |  | Nitrite reductase [NAD(P)H] inhibitor                       | Dimethylargininase inhibitor                         | Urethanase inhibitor                                        |
|  |  |  | Peroxidase inhibitor                             |  | NADPH-ferrihemoprotein reductase inhibitor                  | Glutamine-phenylpyruvate transaminase inhibitor      | Aldehyde dehydrogenase (pyrroloquinoline-quinone) inhibitor |
|  |  |  | UDP-N-acetylglucosamine 4-epimerase inhibitor    |  | 1,4-Lactonase inhibitor                                     | Methylamine-glutamate N-methyltransferase inhibitor  | Histidinol-phosphatase inhibitor                            |
|  |  |  | Aminobutyraldehyde dehydrogenase inhibitor       |  | N-benzoyloxycarbonylglycine hydrolase inhibitor             | Gluconate 2-dehydrogenase (acceptor) inhibitor       | Tryptophanamidase inhibitor                                 |
|  |  |  | 1,4-Lactonase inhibitor                          |  | S-alkylcysteine lyase inhibitor                             | Polyamine-transporting ATPase inhibitor              | Amine dehydrogenase inhibitor                               |
|  |  |  | Vasoprotector                                    |  | Cyclohexyl-isocyanide hydratase inhibitor                   | Gluconate 5-dehydrogenase inhibitor                  | Glutamate-5-semialdehyde dehydrogenase inhibitor            |
|  |  |  | Aryl sulfotransferase inhibitor                  |  | N-Acyl-D-aspartate deacylase inhibitor                      | Benzoate-CoA ligase inhibitor                        | Exoribonuclease II inhibitor                                |
|  |  |  | Antiseptic                                       |  | Fructan beta-fructosidase inhibitor                         | L-glutamate oxidase inhibitor                        | Acetylsterase                                               |
|  |  |  | UGT1A7 substrate                                 |  | Antiseborrheic                                              | Insulysin inhibitor                                  | Allyl-alcohol dehydrogenase inhibitor                       |
|  |  |  | Pectate lyase inhibitor                          |  | Long-chain-aldehyde dehydrogenase inhibitor                 | Chenodeoxycholytaurine hydrolase inhibitor           | 1,4-Lactonase inhibitor                                     |
|  |  |  | Sulfotransferase substrate                       |  | Mucinaminyserine mucinaminidase inhibitor                   | Sulfite oxidase inhibitor                            | Phenol 2-monooxygenase inhibitor                            |
|  |  |  | Glucan 1,4-alpha-maltotetraohydrolase inhibitor  |  | N-acetylneuraminate 7-O(or 9-O)-acetyltransferase inhibitor | Lactaldehyde reductase inhibitor                     | Poly(alpha-L-gulonate) lyase inhibitor                      |
|  |  |  | N-acetylneuraminate synthase inhibitor           |  | UGT1A6 substrate                                            | Aryl-acylamidase inhibitor                           | ADP-thymidine kinase inhibitor                              |
|  |  |  | Eye irritation, inactive                         |  | Naphthalene 1,2-dioxygenase inhibitor                       | Phenylpyruvate decarboxylase inhibitor               | Aspartate-ammonia ligase inhibitor                          |
|  |  |  | UDP-glucuronosyltransferase substrate            |  | Ferredoxin-NAD+ reductase inhibitor                         | Exoribonuclease II inhibitor                         | Glycerol dehydratase inhibitor                              |
|  |  |  | Exoribonuclease II inhibitor                     |  | Phenol O-methyltransferase inhibitor                        | (R)-Pantolactone dehydrogenase (flavin) inhibitor    | Benzoate-CoA ligase inhibitor                               |
|  |  |  | Macrophage colony stimulating factor agonist     |  | N-acetylneuraminate synthase inhibitor                      | Mucinaminyserine mucinaminidase inhibitor            | Fructan beta-fructosidase inhibitor                         |
|  |  |  | S-alkylcysteine lyase inhibitor                  |  | Linoleate diol synthase inhibitor                           | 2,5-Dihydroxypyridine 5,6-dioxygenase inhibitor      | Fibrinolytic                                                |
|  |  |  | Formaldehyde transketolase inhibitor             |  | Phloroglucinol reductase inhibitor                          | Crotonoyl-[acyl-carrier-protein] hydratase inhibitor | 4-Hydroxyproline epimerase inhibitor                        |
|  |  |  | Arylmalonate decarboxylase inhibitor             |  | NADPH peroxidase inhibitor                                  | N-methylhydantoinase (ATP-hydrolysing) inhibitor     | Acylphosphatase inhibitor                                   |
|  |  |  | CYP2A6 substrate                                 |  | Glyoxylate reductase inhibitor                              | Gamma-butyrobetaine dioxygenase inhibitor            | CYP2C12 substrate                                           |
|  |  |  | Arylsulfatase inhibitor                          |  | Gluconate 2-dehydrogenase (acceptor) inhibitor              | Cyclohexyl-isocyanide hydratase inhibitor            | Lactaldehyde reductase inhibitor                            |
|  |  |  | 4-Hydroxyphenylacetate 3-monooxygenase inhibitor |  | Lysase inhibitor                                            | Gentisate 1,2-dioxygenase inhibitor                  | Carbon-monoxide dehydrogenase inhibitor                     |

|  |  |  |                                                            |  |                                                     |                                                 |                                                     |
|--|--|--|------------------------------------------------------------|--|-----------------------------------------------------|-------------------------------------------------|-----------------------------------------------------|
|  |  |  | N-benzoyloxycarbonyl glycine hydrolase inhibitor           |  | N-methylhydantoinase (ATP-hydrolysing) inhibitor    | Formaldehyde transketolase inhibitor            | 2-Oxoaldehyde dehydrogenase (NADP+) inhibitor       |
|  |  |  | Fusarinine-C ornithinesterase inhibitor                    |  | Aspartate-ammonia ligase inhibitor                  | Pterin deaminase inhibitor                      | Peroxidase inhibitor                                |
|  |  |  | CYP4A substrate                                            |  | 2,6-Dihydroxypyridine 3-monooxygenase inhibitor     | Phenol O-methyltransferase inhibitor            | Formaldehyde transketolase inhibitor                |
|  |  |  | 2,6-Dihydroxypyridine 3-monooxygenase inhibitor            |  | Acetylcholinesterase inhibitor                      | Lysase inhibitor                                | Arylalkyl acylamidase inhibitor                     |
|  |  |  | N-formylmethionyl-peptidase inhibitor                      |  | Trans-acenaphthene-1,2-diol dehydrogenase inhibitor | 3-Hydroxybenzoate 4-monooxygenase inhibitor     | Phenol O-methyltransferase inhibitor                |
|  |  |  | Electron-transferring-flavoprotein dehydrogenase inhibitor |  | 2-Oxoaldehyde dehydrogenase (NADP+) inhibitor       | S-alkylcysteine lyase inhibitor                 | Fructose 5-dehydrogenase inhibitor                  |
|  |  |  | Creatininase inhibitor                                     |  | Mucositis treatment                                 | N-Acyl-D-aspartate deacylase inhibitor          | Preneoplastic conditions treatment                  |
|  |  |  | Anthelmintic (Nematodes)                                   |  | Carbon-monoxide dehydrogenase inhibitor             | N-acetylneuraminase synthase inhibitor          | Prostaglandin-A1 DELTA-isomerase inhibitor          |
|  |  |  | Glyoxylate oxidase inhibitor                               |  | CYP2C12 substrate                                   | Mucomembranous protector                        | 4-Nitrophenol 2-monooxygenase inhibitor             |
|  |  |  | Lysostaphin inhibitor                                      |  | 4-Coumarate-CoA ligase inhibitor                    | ADP-thymidine kinase inhibitor                  | Tpr proteinase (Porphyromonas gingivalis) inhibitor |
|  |  |  | Acylcarnitine hydrolase inhibitor                          |  | 3-Hydroxy-4-oxoquinoline 2,4-dioxygenase inhibitor  | N-benzoyloxycarbonylglycine hydrolase inhibitor | Uroporphyrinogen-III synthase inhibitor             |
|  |  |  | GST M substrate                                            |  | Mannan endo-1,4-beta-mannosidase inhibitor          | Naphthalene 1,2-dioxygenase inhibitor           | Pro-opiomelanocortin converting enzyme inhibitor    |
|  |  |  | Monodehydroascorbate reductase (NADH) inhibitor            |  | Tryptophanamidase inhibitor                         | Ferredoxin-NAD+ reductase inhibitor             | Pectate lyase inhibitor                             |
|  |  |  | Di-trans,poly-cis-decaprenylcistransferase inhibitor       |  | Mannitol-1-phosphatase inhibitor                    | Fructan beta-fructosidase inhibitor             | Xylan endo-1,3-beta-xylosidase inhibitor            |
|  |  |  | Aspartate-ammonia ligase inhibitor                         |  | Lysine 2,3-aminomutase inhibitor                    | Aryl sulfotransferase inhibitor                 | 2-Oxoglutarate decarboxylase inhibitor              |
|  |  |  | Prostaglandin-E2 9-reductase inhibitor                     |  | Poly(alpha-L-gulonate) lyase inhibitor              | Urease inhibitor                                | Astringent                                          |
|  |  |  | Alopecia treatment                                         |  | Uroporphyrinogen-III synthase inhibitor             | HIF1A expression inhibitor                      | Cholestanetriol 26-monooxygenase inhibitor          |
|  |  |  | 5-O-(4-coumaroyl)-D-quinic acid 3'-monooxygenase inhibitor |  | Phenylpyruvate decarboxylase inhibitor              | Acylphosphatase inhibitor                       | Guanidinoacetase inhibitor                          |
|  |  |  | Venombin AB inhibitor                                      |  | Salicylate 1-monooxygenase inhibitor                | Hydroxylamine reductase (NADH) inhibitor        | Centromere associated protein inhibitor             |
|  |  |  | All-trans-retinyl-palmitate hydrolase inhibitor            |  | Allyl-alcohol dehydrogenase inhibitor               | Glyoxylate reductase inhibitor                  | Glyoxylate reductase inhibitor                      |
|  |  |  | ADP-thymidine kinase inhibitor                             |  | Glucan endo-1,3-beta-D-glucosidase inhibitor        | Aspartate-ammonia ligase inhibitor              | Mitochondrial processing peptidase inhibitor        |
|  |  |  | Anticemetic                                                |  | Hydroxylamine reductase (NADH) inhibitor            | 2-Oxoaldehyde dehydrogenase (NADP+) inhibitor   | Anticemetic                                         |
|  |  |  |                                                            |  | Rhamnulose-1-phosphate aldolase inhibitor           | Carbon-monoxide dehydrogenase inhibitor         | Anticemetic                                         |
|  |  |  |                                                            |  | Anthranilate-CoA ligase inhibitor                   | Mannan endo-1,4-beta-mannosidase inhibitor      | Mannan endo-1,4-beta-mannosidase inhibitor          |

|  |  |  |  |  |                                                                     |                                                                            |                                                                     |
|--|--|--|--|--|---------------------------------------------------------------------|----------------------------------------------------------------------------|---------------------------------------------------------------------|
|  |  |  |  |  | Cholestanetriol 26-monooxygenase inhibitor                          | 3-Hydroxy-4-oxoquinoline 2,4-dioxygenase inhibitor                         | Anthranilate-CoA ligase inhibitor                                   |
|  |  |  |  |  | 3-Hydroxybenzoate 4-monooxygenase inhibitor                         | Glucan endo-1,3-beta-D-glucosidase inhibitor                               | Poly(beta-D-mannuronate) lyase inhibitor                            |
|  |  |  |  |  | Aryl-alcohol dehydrogenase (NADP+) inhibitor                        | Rhamnulose-1-phosphate aldolase inhibitor                                  | Limulus clotting factor B inhibitor                                 |
|  |  |  |  |  | Insulysin inhibitor                                                 | Prostaglandin-A1 DELTA-isomerase inhibitor                                 | Nicotinate dehydrogenase inhibitor                                  |
|  |  |  |  |  | Limulus clotting factor B inhibitor                                 | Salicylate 1-monooxygenase inhibitor                                       | Transketolase inhibitor                                             |
|  |  |  |  |  | Benzoate 4-monooxygenase inhibitor                                  | Alkenylglycerophosphoethanolamine hydrolase inhibitor                      | Aryldialkylphosphatase inhibitor                                    |
|  |  |  |  |  | Hydrogen dehydrogenase inhibitor                                    | Tryptophanamidase inhibitor                                                | N-carbamoyl-L-amino-acid hydrolase inhibitor                        |
|  |  |  |  |  | L-glucuronate reductase inhibitor                                   | Pyruvate decarboxylase inhibitor                                           | Beta-carotene 15,15'-monooxygenase inhibitor                        |
|  |  |  |  |  | Tpr proteinase (Porphyromonas gingivalis) inhibitor                 | Histidinol-phosphatase inhibitor                                           | 6-Pyruvoyltetrahydropterin synthase inhibitor                       |
|  |  |  |  |  | Mitochondrial processing peptidase inhibitor                        | Mannitol-1-phosphatase inhibitor                                           | Homoaconitate hydratase inhibitor                                   |
|  |  |  |  |  | 3-Carboxyethylcatechol 2,3-dioxygenase inhibitor                    | Magnesium-protoporphyrin IX monomethyl ester (oxidative) cyclase inhibitor |                                                                     |
|  |  |  |  |  | Aminocarboxymuconate-semialdehyde decarboxylase inhibitor           | MMP9 expression inhibitor                                                  | Biotin-CoA ligase inhibitor                                         |
|  |  |  |  |  | Steroid N-acetylglucosaminyltransferase inhibitor                   | Uroporphyrinogen-III synthase inhibitor                                    | Triacetate-lactonase inhibitor                                      |
|  |  |  |  |  | Histidinol-phosphatase inhibitor                                    | Orcinol 2-monooxygenase inhibitor                                          | 6-Carboxyhexanoate-CoA ligase inhibitor                             |
|  |  |  |  |  | Fragilysin inhibitor                                                | N-hydroxyarylamine O-acetyltransferase inhibitor                           | 4-Chlorophenylacetate 3,4-dioxygenase inhibitor                     |
|  |  |  |  |  | Polygalacturonase inhibitor                                         | Pectate lyase inhibitor                                                    | Peptide-N4-(N-acetyl-beta-glucosaminyl)asparagine amidase inhibitor |
|  |  |  |  |  | CYP2H substrate                                                     | Choleretic                                                                 | L-amino-acid oxidase inhibitor                                      |
|  |  |  |  |  | Peptide-N4-(N-acetyl-beta-glucosaminyl)asparagine amidase inhibitor | Antiinflammatory, intestinal                                               | NADPH peroxidase inhibitor                                          |
|  |  |  |  |  | Prostaglandin-A1 DELTA-isomerase inhibitor                          | Lysine 2,3-aminomutase inhibitor                                           | Glycerol dehydrogenase (NADP+) inhibitor                            |
|  |  |  |  |  | Pyruvate decarboxylase inhibitor                                    | Limulus clotting factor B inhibitor                                        | Catechol oxidase inhibitor                                          |
|  |  |  |  |  | Antiinfective                                                       | Monophenol monooxygenase inhibitor                                         | Lysine 2,3-aminomutase inhibitor                                    |
|  |  |  |  |  | Xylan endo-1,3-beta-xylosidase inhibitor                            | Aryldialkylphosphatase inhibitor                                           | 3-Hydroxyphenylacetate 6-hydroxylase inhibitor                      |
|  |  |  |  |  | 6-Pyruvoyltetrahydropterin synthase inhibitor                       | Polygalacturonase inhibitor                                                | Glutarate-semialdehyde dehydrogenase inhibitor                      |
|  |  |  |  |  | D-xylulose reductase inhibitor                                      | MAP kinase stimulant                                                       | DNA-(apurinic or apyrimidinic site) lyase inhibitor                 |
|  |  |  |  |  | Glutarate-semialdehyde dehydrogenase inhibitor                      | UGT2B1 substrate                                                           | Linoleate diol synthase inhibitor                                   |
|  |  |  |  |  | 4-Chlorophenylacetate 3,4-dioxygenase inhibitor                     | Acetylcholinesterase inhibitor                                             | Styrene-oxide isomerase inhibitor                                   |
|  |  |  |  |  | Astringent                                                          | Sarcosine oxidase inhibitor                                                | 3-Hydroxy-4-oxoquinoline 2,4-dioxygenase inhibitor                  |

|  |  |  |  |  |                                                                            |                                                         |                                                                                       |
|--|--|--|--|--|----------------------------------------------------------------------------|---------------------------------------------------------|---------------------------------------------------------------------------------------|
|  |  |  |  |  | Poly(beta-D-mannuronate) lyase inhibitor                                   | CYP2H substrate                                         | Arylsulfatase inhibitor                                                               |
|  |  |  |  |  | Cyclohexanone monooxygenase inhibitor                                      | H <sup>+</sup> -exporting ATPase inhibitor              | Sarcosine oxidase inhibitor                                                           |
|  |  |  |  |  | Gamma-butyrobetaine dioxygenase inhibitor                                  | Hydrogen dehydrogenase inhibitor                        | Ornithine cyclodeaminase inhibitor                                                    |
|  |  |  |  |  | Saccharopepsin inhibitor                                                   | APOA1 expression enhancer                               | Phenylacetate-CoA ligase inhibitor                                                    |
|  |  |  |  |  | Acrocyllindropepsin inhibitor                                              | Tpr proteinase (Porphyromonas gingivalis) inhibitor     | Glycerol 2-dehydrogenase (NADP <sup>+</sup> ) inhibitor                               |
|  |  |  |  |  | Chymosin inhibitor                                                         | Cytoprotectant                                          | D-xylulose reductase inhibitor                                                        |
|  |  |  |  |  | Triacetate-lactonase inhibitor                                             | Anthranilate-CoA ligase inhibitor                       | Carnitinamidase inhibitor                                                             |
|  |  |  |  |  | 6-Carboxyhexanoate-CoA ligase inhibitor                                    | L-glucuronate reductase inhibitor                       | Salicylate 1-monooxygenase inhibitor                                                  |
|  |  |  |  |  | Homoaconitate hydratase inhibitor                                          | Rubredoxin-NAD <sup>+</sup> reductase inhibitor         | Hydrogen dehydrogenase inhibitor                                                      |
|  |  |  |  |  | Biotin-CoA ligase inhibitor                                                | UGT1A9 substrate                                        | Fragilysin inhibitor                                                                  |
|  |  |  |  |  | Aryldialkylphosphatase inhibitor                                           | Poly(alpha-L-guluronate) lyase inhibitor                | Mannitol-1-phosphatase inhibitor                                                      |
|  |  |  |  |  | Magnesium-protoporphyrin IX monomethyl ester (oxidative) cyclase inhibitor | Cyclohexanone monooxygenase inhibitor                   | Creatinine deaminase inhibitor                                                        |
|  |  |  |  |  | Alkenylglycerophosphoethanolamine hydrolase inhibitor                      | Antiinfective                                           | 2-Pyrocatechuate decarboxylase inhibitor                                              |
|  |  |  |  |  | Gluconolactonase inhibitor                                                 | Antipyretic                                             | 4-Hydroxyglutamate transaminase inhibitor                                             |
|  |  |  |  |  | Aryl-acylamidase inhibitor                                                 | Glycerol 2-dehydrogenase (NADP <sup>+</sup> ) inhibitor | Alkenylglycerophosphoethanolamine hydrolase inhibitor                                 |
|  |  |  |  |  | H <sup>+</sup> -exporting ATPase inhibitor                                 | Lipoprotein lipase inhibitor                            | Gluconolactonase inhibitor                                                            |
|  |  |  |  |  | 4-Hydroxyglutamate transaminase inhibitor                                  | Chymosin inhibitor                                      | 3-Carboxyethylcatechol 2,3-dioxygenase inhibitor                                      |
|  |  |  |  |  | Arylalkyl acylamidase inhibitor                                            | Saccharopepsin inhibitor                                | Aminocarboxymuconate-semialdehyde decarboxylase inhibitor                             |
|  |  |  |  |  | Urease inhibitor                                                           | Acrocyllindropepsin inhibitor                           | S-formylglutathione hydrolase inhibitor                                               |
|  |  |  |  |  | 2,5-Dihydroxypyridine 5,6-dioxygenase inhibitor                            | NADPH peroxidase inhibitor                              | Antimutagenic                                                                         |
|  |  |  |  |  | Ornithine cyclodeaminase inhibitor                                         | TP53 expression enhancer                                | 3,4-Dihydroxy-9,10-secoandrosta-1,3,5(10)-triene-9,17-dione 4,5-dioxygenase inhibitor |
|  |  |  |  |  | Diphosphomevalonate decarboxylase inhibitor                                | Prostaglandin-E2 9-reductase inhibitor                  | Opine dehydrogenase inhibitor                                                         |
|  |  |  |  |  | Styrene-oxide isomerase inhibitor                                          | Phobic disorders treatment                              | Leucolysin inhibitor                                                                  |
|  |  |  |  |  | Phospholipid-translocating ATPase inhibitor                                |                                                         | Camphor 1,2-monooxygenase inhibitor                                                   |
|  |  |  |  |  | S-formylglutathione hydrolase inhibitor                                    |                                                         | 2-Enoate reductase inhibitor                                                          |
|  |  |  |  |  | Diiodophenylpyruvate reductase inhibitor                                   |                                                         | Mucomembranous protector                                                              |
|  |  |  |  |  | N-hydroxyarylamine O-acetyltransferase inhibitor                           |                                                         | Nitrilase inhibitor                                                                   |
|  |  |  |  |  | (R)-6-hydroxynicotine oxidase inhibitor                                    |                                                         | Levanase inhibitor                                                                    |
|  |  |  |  |  | Kidney function stimulant                                                  |                                                         | 4-Phytase inhibitor                                                                   |
|  |  |  |  |  | Levanase inhibitor                                                         |                                                         | Aryl-acylamidase inhibitor                                                            |

|  |  |  |  |  |                                             |  |                                                             |
|--|--|--|--|--|---------------------------------------------|--|-------------------------------------------------------------|
|  |  |  |  |  | Carnitinamidase inhibitor                   |  | Diiodophenylpyruvate reductase inhibitor                    |
|  |  |  |  |  | Histidine N-acetyltransferase inhibitor     |  | D-alanine 2-hydroxymethyltransferase inhibitor              |
|  |  |  |  |  | Lipoprotein lipase inhibitor                |  | Membrane permeability inhibitor                             |
|  |  |  |  |  | Prostaglandin-E2 9-reductase inhibitor      |  | CDP-4-dehydro-6-deoxyglucose reductase inhibitor            |
|  |  |  |  |  | TP53 expression enhancer                    |  | Mannan endo-1,6-alpha-mannosidase inhibitor                 |
|  |  |  |  |  | Mucomembranous protector                    |  | 3-Oxo adipate enol-lactonase inhibitor                      |
|  |  |  |  |  | G-protein-coupled receptor kinase inhibitor |  | Thymidylate 5'-phosphatase inhibitor                        |
|  |  |  |  |  | Beta-adrenergic receptor kinase inhibitor   |  | 2-Haloacid dehalogenase (configuration-inverting) inhibitor |
|  |  |  |  |  | Phobic disorders treatment                  |  | Nicotine dehydrogenase inhibitor                            |
|  |  |  |  |  |                                             |  | (R)-Pantolactone dehydrogenase (flavin) inhibitor           |
|  |  |  |  |  |                                             |  | Pyruvate dehydrogenase (cytochrome) inhibitor               |
|  |  |  |  |  |                                             |  | Trans-2-enoyl-CoA reductase (NAD+) inhibitor                |
|  |  |  |  |  |                                             |  | 4,5-Dihydroxyphthalate decarboxylase inhibitor              |
|  |  |  |  |  |                                             |  | Glycerol-1-phosphatase inhibitor                            |
|  |  |  |  |  |                                             |  | Trans-pentaprenyltranstransferase inhibitor                 |
|  |  |  |  |  |                                             |  | Cyclomaltodextrinase inhibitor                              |
|  |  |  |  |  |                                             |  | 2-Dehydropantolactone reductase (A-specific) inhibitor      |
|  |  |  |  |  |                                             |  | Sulfite dehydrogenase inhibitor                             |
|  |  |  |  |  |                                             |  | N-acetyl-gamma-glutamyl-phosphate reductase inhibitor       |
|  |  |  |  |  |                                             |  | 4-Hydroxyphenylacetate 3-monooxygenase inhibitor            |
|  |  |  |  |  |                                             |  | Shikimate 5-dehydrogenase inhibitor                         |
|  |  |  |  |  |                                             |  | P-benzoquinone reductase (NADPH) inhibitor                  |
|  |  |  |  |  |                                             |  | N-hydroxy-2-acetamidofluorene reductase inhibitor           |
|  |  |  |  |  |                                             |  | Methylaspartate ammonia-lyase inhibitor                     |
|  |  |  |  |  |                                             |  | Polygalacturonase inhibitor                                 |
|  |  |  |  |  |                                             |  | 3,4-Dihydroxyphenylacetate 2,3-dioxygenase inhibitor        |
|  |  |  |  |  |                                             |  | Benzaldehyde dehydrogenase (NADP+) inhibitor                |

|  |  |  |  |  |  |  |                                                    |
|--|--|--|--|--|--|--|----------------------------------------------------|
|  |  |  |  |  |  |  | Hydroxylamine reductase (NADH) inhibitor           |
|  |  |  |  |  |  |  | Nitrite reductase [NAD(P)H] inhibitor              |
|  |  |  |  |  |  |  | Mucositis treatment                                |
|  |  |  |  |  |  |  | Quinate 5-dehydrogenase inhibitor                  |
|  |  |  |  |  |  |  | Phosphoinositide 5-phosphatase inhibitor           |
|  |  |  |  |  |  |  | Pantoate 4-dehydrogenase inhibitor                 |
|  |  |  |  |  |  |  | Ferredoxin-nitrite reductase inhibitor             |
|  |  |  |  |  |  |  | Phospholipid-translocating ATPase inhibitor        |
|  |  |  |  |  |  |  | D-amino-acid dehydrogenase inhibitor               |
|  |  |  |  |  |  |  | JAK2 expression inhibitor                          |
|  |  |  |  |  |  |  | G-protein-coupled receptor kinase inhibitor        |
|  |  |  |  |  |  |  | Beta-adrenergic receptor kinase inhibitor          |
|  |  |  |  |  |  |  | Aminomuconate-semialdehyde dehydrogenase inhibitor |
|  |  |  |  |  |  |  | Glycolate dehydrogenase inhibitor                  |
|  |  |  |  |  |  |  | Phosphatidylglycerophosphatase inhibitor           |
|  |  |  |  |  |  |  | Quinoprotein glucose dehydrogenase inhibitor       |
|  |  |  |  |  |  |  | D-lactaldehyde dehydrogenase inhibitor             |
|  |  |  |  |  |  |  | Lysase inhibitor                                   |
|  |  |  |  |  |  |  | Inulinase inhibitor                                |
|  |  |  |  |  |  |  | APOA1 expression enhancer                          |
|  |  |  |  |  |  |  | Hippurate hydrolase inhibitor                      |
|  |  |  |  |  |  |  | Histidine N-acetyltransferase inhibitor            |
|  |  |  |  |  |  |  | Glutamate decarboxylase inhibitor                  |
|  |  |  |  |  |  |  | 3-Hydroxybutyryl-CoA dehydrogenase inhibitor       |
|  |  |  |  |  |  |  | 2,4-Diaminopentanoate dehydrogenase inhibitor      |



|  |  |  |  |  |  |  |                                                                 |
|--|--|--|--|--|--|--|-----------------------------------------------------------------|
|  |  |  |  |  |  |  | Beta-mannosidase inhibitor                                      |
|  |  |  |  |  |  |  | Protein-Npi-phosphohistidine-sugar phosphotransferase inhibitor |
|  |  |  |  |  |  |  | Isopenicillin-N epimerase inhibitor                             |
|  |  |  |  |  |  |  | Alcohol dehydrogenase (NADP+) inhibitor                         |
|  |  |  |  |  |  |  | Carboxylate reductase inhibitor                                 |
|  |  |  |  |  |  |  | UGT1A6 substrate                                                |
|  |  |  |  |  |  |  | Phenylalanine(histidine) transaminase inhibitor                 |
|  |  |  |  |  |  |  | Methylumbelliferyl-acetate deacetylase inhibitor                |
|  |  |  |  |  |  |  | Dopachrome isomerase inhibitor                                  |
|  |  |  |  |  |  |  | 2,4-Dichlorophenol 6-monooxygenase inhibitor                    |
|  |  |  |  |  |  |  | Beta-amylase inhibitor                                          |
|  |  |  |  |  |  |  | Phosphoglycerate mutase inhibitor                               |
|  |  |  |  |  |  |  | Cyanoalanine nitrilase inhibitor                                |
|  |  |  |  |  |  |  | Antiinfective                                                   |
|  |  |  |  |  |  |  | CYP2J2 substrate                                                |
|  |  |  |  |  |  |  | Glucan endo-1,3-alpha-glucosidase inhibitor                     |
|  |  |  |  |  |  |  | Lombricine kinase inhibitor                                     |
|  |  |  |  |  |  |  | H+-exporting ATPase inhibitor                                   |
|  |  |  |  |  |  |  | 4-Coumarate-CoA ligase inhibitor                                |
|  |  |  |  |  |  |  | Kidney function stimulant                                       |
|  |  |  |  |  |  |  | Dihydroxy-acid dehydratase inhibitor                            |
|  |  |  |  |  |  |  | Leukotriene-B4 20-monooxygenase inhibitor                       |
|  |  |  |  |  |  |  | Insulysin inhibitor                                             |
|  |  |  |  |  |  |  | Nicotinic alpha6beta3beta4alpha5 receptor antagonist            |
|  |  |  |  |  |  |  | Myosin ATPase inhibitor                                         |
|  |  |  |  |  |  |  | 3-Aminobutyryl-CoA ammonia-lyase inhibitor                      |
|  |  |  |  |  |  |  | Vomilenine glucosyltransferase inhibitor                        |

|  |  |  |  |  |  |  |                                                        |
|--|--|--|--|--|--|--|--------------------------------------------------------|
|  |  |  |  |  |  |  | Indoleacetaldoxime dehydratase inhibitor               |
|  |  |  |  |  |  |  | Rubredoxin-NAD+ reductase inhibitor                    |
|  |  |  |  |  |  |  | Glyceryl-ether monooxygenase inhibitor                 |
|  |  |  |  |  |  |  | Pyruvate dehydrogenase (lipoamide) inhibitor           |
|  |  |  |  |  |  |  | Licheninase inhibitor                                  |
|  |  |  |  |  |  |  | Saccharopepsin inhibitor                               |
|  |  |  |  |  |  |  | Chymosin inhibitor                                     |
|  |  |  |  |  |  |  | Acrocyllindropepsin inhibitor                          |
|  |  |  |  |  |  |  | Anaphylatoxin receptor antagonist                      |
|  |  |  |  |  |  |  | Complement factor D inhibitor                          |
|  |  |  |  |  |  |  | Chloramphenicol O-acetyltransferase inhibitor          |
|  |  |  |  |  |  |  | Cystathionine beta-synthase inhibitor                  |
|  |  |  |  |  |  |  | Acetate kinase inhibitor                               |
|  |  |  |  |  |  |  | Carnosine synthase inhibitor                           |
|  |  |  |  |  |  |  | Prephenate dehydrogenase inhibitor                     |
|  |  |  |  |  |  |  | Phenylacetaldehyde dehydrogenase inhibitor             |
|  |  |  |  |  |  |  | Orotate reductase (NADPH) inhibitor                    |
|  |  |  |  |  |  |  | 4-Hydroxybenzoate 3-monooxygenase inhibitor            |
|  |  |  |  |  |  |  | Alpha-N-acetylglucosaminidase inhibitor                |
|  |  |  |  |  |  |  | Biotinidase inhibitor                                  |
|  |  |  |  |  |  |  | Tannase inhibitor                                      |
|  |  |  |  |  |  |  | 3-Cyanoalanine hydratase inhibitor                     |
|  |  |  |  |  |  |  | L-iduronidase inhibitor                                |
|  |  |  |  |  |  |  | 3-Demethylubiquinone-9 3-O-methyltransferase inhibitor |
|  |  |  |  |  |  |  | Urease inhibitor                                       |
|  |  |  |  |  |  |  | Gly-X carboxypeptidase inhibitor                       |
|  |  |  |  |  |  |  | Leucine dehydrogenase inhibitor                        |
|  |  |  |  |  |  |  | Phobic disorders treatment                             |

|  |  |  |  |  |  |  |                                                                           |
|--|--|--|--|--|--|--|---------------------------------------------------------------------------|
|  |  |  |  |  |  |  | Protein-glutamate<br>methylesterase<br>inhibitor                          |
|  |  |  |  |  |  |  | Thiosulfate<br>dehydrogenase<br>inhibitor                                 |
|  |  |  |  |  |  |  | HIF1A expression<br>inhibitor                                             |
|  |  |  |  |  |  |  | Cyclamate<br>sulfohydrolase<br>inhibitor                                  |
|  |  |  |  |  |  |  | 3-Phytase inhibitor                                                       |
|  |  |  |  |  |  |  | X-methyl-His<br>dipeptidase inhibitor                                     |
|  |  |  |  |  |  |  | N-(long-chain-<br>acyl)ethanolamine<br>deacylase inhibitor                |
|  |  |  |  |  |  |  | Carboxypeptidase Taq<br>inhibitor                                         |
|  |  |  |  |  |  |  | Butyrate-CoA ligase<br>inhibitor                                          |
|  |  |  |  |  |  |  | Plasmanylethanolamin<br>e desaturase inhibitor                            |
|  |  |  |  |  |  |  | Steroid N-<br>acetylglucosaminyltra<br>nsferase inhibitor                 |
|  |  |  |  |  |  |  | Porphobilinogen<br>synthase inhibitor                                     |
|  |  |  |  |  |  |  | UGT2B1 substrate                                                          |
|  |  |  |  |  |  |  | Glycosylphosphatidyl<br>inositol phospholipase<br>D inhibitor             |
|  |  |  |  |  |  |  | Oxidoreductase<br>inhibitor                                               |
|  |  |  |  |  |  |  | 1-<br>Alkylglycerophosphoc<br>holine O-<br>acetyltransferase<br>inhibitor |
|  |  |  |  |  |  |  | O-aminophenol<br>oxidase inhibitor                                        |
|  |  |  |  |  |  |  | Dimethylmaleate<br>hydratase inhibitor                                    |
|  |  |  |  |  |  |  | Malate<br>dehydrogenase<br>(acceptor) inhibitor                           |
|  |  |  |  |  |  |  | Gluconate 2-<br>dehydrogenase<br>(acceptor) inhibitor                     |
|  |  |  |  |  |  |  | Ecdysone 20-<br>monooxygenase<br>inhibitor                                |
|  |  |  |  |  |  |  | Manganese peroxidase<br>inhibitor                                         |
|  |  |  |  |  |  |  | Cyclohexanone<br>monooxygenase<br>inhibitor                               |
|  |  |  |  |  |  |  | 4-Hydroxybenzoate 1-<br>hydroxylase inhibitor                             |
|  |  |  |  |  |  |  | DNA-3-methyladenine<br>glycosylase I inhibitor                            |
|  |  |  |  |  |  |  | Phthalate 4,5-<br>dioxygenase inhibitor                                   |

[illegible]

|  |  |  |  |  |  |  |                                           |
|--|--|--|--|--|--|--|-------------------------------------------|
|  |  |  |  |  |  |  | Homogentisate 1,2-dioxygenase inhibitor   |
|  |  |  |  |  |  |  | Arylformamidase inhibitor                 |
|  |  |  |  |  |  |  | Lipid metabolism regulator                |
|  |  |  |  |  |  |  | Arylmalonate decarboxylase inhibitor      |
|  |  |  |  |  |  |  | Erythropoiesis stimulant                  |
|  |  |  |  |  |  |  | Aspartyltransferase inhibitor             |
|  |  |  |  |  |  |  | CYP2H substrate                           |
|  |  |  |  |  |  |  | N-formylmethionyl-peptidase inhibitor     |
|  |  |  |  |  |  |  | Venombin AB inhibitor                     |
|  |  |  |  |  |  |  | Acylcarnitine hydrolase inhibitor         |
|  |  |  |  |  |  |  | Nicotinic alpha2beta2 receptor antagonist |

**Table S2.** Non-bond interaction of selected compounds with each enzyme active site

|       | Compound             | Hydrogen Bond interaction |                   |              | Hydrophobic Bond interaction |                   |              | Electrostatic interaction |                   |              | Halogen bond interaction/Pi-sulfur |                   |              |
|-------|----------------------|---------------------------|-------------------|--------------|------------------------------|-------------------|--------------|---------------------------|-------------------|--------------|------------------------------------|-------------------|--------------|
|       |                      | No of bonds               | Residues involved | Distance (Å) | No of bonds                  | Residues involved | Distance (Å) | No of bonds               | Residues involved | Distance (Å) | No of bonds                        | Residues involved | Distance (Å) |
| COX-1 | Ferulic acid (7.83)  | 6                         | H2O2133           | 2.18         | 4                            |                   |              | 1                         | Arg 120           | 3.59         |                                    |                   |              |
|       |                      |                           | Arg 120           | 1.69         |                              | Phe 518           | 4.77         |                           |                   |              |                                    |                   |              |
|       |                      |                           | Arg 120           | 2.04         |                              | Val 349           | 4.24         |                           |                   |              |                                    |                   |              |
|       |                      |                           | Tyr 355           | 1.58         |                              | Leu 352           | 5.20         |                           |                   |              |                                    |                   |              |
|       |                      |                           | Met 522           | 2.62         |                              | Ala 527           | 3.97         |                           |                   |              |                                    |                   |              |
|       |                      |                           | Met 522           | 2.35         |                              |                   |              |                           |                   |              |                                    |                   |              |
|       | Vanilic acid (7.72)  | 5                         | Arg 120           | 1.72         | 6                            | Leu 352           | 3.87         |                           |                   |              |                                    |                   |              |
|       |                      |                           | H2O2133           | 1.91         |                              | Ile 523           | 4.38         |                           |                   |              |                                    |                   |              |
|       |                      |                           | Arg 120           | 1.68         |                              | Phe 518           | 4.64         |                           |                   |              |                                    |                   |              |
|       |                      |                           | Tyr 355           | 1.60         |                              | Val 349           | 5.10         |                           |                   |              |                                    |                   |              |
|       |                      |                           | Leu 352           | 2.95         |                              | Ile 523           | 5.22         |                           |                   |              |                                    |                   |              |
|       |                      |                           |                   |              |                              | Ala 527           | 3.66         |                           |                   |              |                                    |                   |              |
|       | Syringic acid (7.60) | 5                         |                   |              | 9                            | Ala 527           | 4.11         | 1                         | Arg 120           | 3.94         |                                    |                   |              |
|       |                      |                           |                   |              |                              | Leu 352           | 4.12         |                           |                   |              |                                    |                   |              |
|       |                      |                           | H2O2133           | 1.92         |                              | Ile 523           | 4.14         |                           |                   |              |                                    |                   |              |
|       |                      |                           | Arg 120           | 2.02         |                              | Val 349           | 3.82         |                           |                   |              |                                    |                   |              |
|       |                      |                           | Arg 120           | 1.86         |                              | Leu 531           | 3.71         |                           |                   |              |                                    |                   |              |
|       |                      |                           | Tyr 355           | 1.85         |                              | Phe 518           | 4.61         |                           |                   |              |                                    |                   |              |

|         |                            |                     |          |          |         |         |                  |      |         |         |      |         |      |  |
|---------|----------------------------|---------------------|----------|----------|---------|---------|------------------|------|---------|---------|------|---------|------|--|
| COX-2   |                            |                     | Leu 352  | 2.94     |         | Val 349 | 5.04             |      |         |         |      |         |      |  |
|         |                            |                     |          |          |         | Ile 523 | 5.21             |      |         |         |      |         |      |  |
|         |                            |                     |          |          |         | Ala 527 | 3.68             |      |         |         |      |         |      |  |
|         | Diclofenac (9.82)          | 5                   | Arg 120  | 1.98     | 6       | Leu 352 | 5.37             | 1    | Arg 120 | 3.52    | 1    | Met 522 | 2.55 |  |
|         |                            | H2O2133             | 2.02     | Ile 523  |         | 4.00    |                  |      |         |         |      |         |      |  |
|         |                            | Arg 120             | 1.54     | Ala 527  |         | 4.67    |                  |      |         |         |      |         |      |  |
|         |                            | Tyr 355             | 1.85     | Val 349  |         | 4.96    |                  |      |         |         |      |         |      |  |
|         |                            | Ser 530             | 2.29     | Leu 352  |         | 4.91    |                  |      |         |         |      |         |      |  |
|         |                            |                     |          | Ala 527  |         | 5.19    |                  |      |         |         |      |         |      |  |
|         |                            | Vanilic acid (6.61) | 5        | H2O 5210 | 2.28    | 4       | Trp 387          | 5.35 |         |         |      |         |      |  |
|         | Tyr 385                    |                     |          | 1.70     | Val 349 |         | 4.78             |      |         |         |      |         |      |  |
|         | Ser 530                    |                     |          | 1.82     | Leu 352 |         | 3.97             |      |         |         |      |         |      |  |
|         | Met 522                    |                     |          | 2.53     | Leu 352 |         | 5.49             |      |         |         |      |         |      |  |
|         | Val 523                    |                     |          | 2.56     |         |         |                  |      |         |         |      |         |      |  |
|         |                            | Sinapic acid (6.56) | 5        |          |         | 8       | Gly 526, Ala 527 | 4.40 | 1       | Arg 120 | 3.24 |         |      |  |
| Tyr 355 | 2.06                       |                     |          | Val 349  | 4.41    |         |                  |      |         |         |      |         |      |  |
| Ser 530 | 1.75                       |                     |          | Leu 384  | 5.33    |         |                  |      |         |         |      |         |      |  |
| Ser 530 | 2.85                       |                     |          | Met 522  | 4.66    |         |                  |      |         |         |      |         |      |  |
| Met 522 | 2.54                       |                     |          | Tyr 348  | 4.72    |         |                  |      |         |         |      |         |      |  |
| Met 522 | 2.45                       |                     |          | Val 349  | 4.95    |         |                  |      |         |         |      |         |      |  |
|         |                            |                     |          | Leu 352  | 5.45    |         |                  |      |         |         |      |         |      |  |
|         |                            |                     |          | Ala 527  | 4.54    |         |                  |      |         |         |      |         |      |  |
|         | Protocatechuic acid (6.55) | 5                   | H2O 5210 | 2.29     | 1       | Trp 387 | 5.37             |      |         |         |      |         |      |  |
| Tyr 385 |                            |                     | 1.67     |          |         |         |                  |      |         |         |      |         |      |  |
| Ser 530 |                            |                     | 1.81     |          |         |         |                  |      |         |         |      |         |      |  |
| Met 522 |                            |                     | 2.52     |          |         |         |                  |      |         |         |      |         |      |  |
| Val 523 |                            |                     | 2.54     |          |         |         |                  |      |         |         |      |         |      |  |
|         | Etoricoxib (7.98)          | 3                   |          |          | 13      | Ser 353 | 2.00             |      |         |         |      |         |      |  |
|         |                            |                     |          | Val 116  |         | 4.53    |                  |      |         |         |      |         |      |  |
|         |                            |                     |          | Leu 359  |         | 4.55    |                  |      |         |         |      |         |      |  |
|         |                            |                     |          | Leu 384  |         | 5.32    |                  |      |         |         |      |         |      |  |
|         |                            |                     |          | Met 522  |         | 4.44    |                  |      |         |         |      |         |      |  |
| Phe 518 |                            |                     | 2.86     | Tyr 355  |         | 4.53    |                  |      |         |         |      |         |      |  |
| His 90  |                            |                     | 2.78     | Trp 387  |         | 4.71    |                  |      |         |         |      |         |      |  |

|       |                            |    |         |      |   |         |      |   |         |      |
|-------|----------------------------|----|---------|------|---|---------|------|---|---------|------|
|       |                            |    | Ala 527 | 3.00 |   | Phe 518 | 4.65 |   |         |      |
|       |                            |    |         |      |   | Val 349 | 4.64 |   |         |      |
|       |                            |    |         |      |   | Ala 527 | 3.79 |   |         |      |
|       |                            |    |         |      |   | val 523 | 4.67 |   |         |      |
|       |                            |    |         |      |   | Ala 527 | 4.40 |   |         |      |
|       |                            |    |         |      |   | val 523 | 3.48 |   |         |      |
| LOX-5 | Rutin (10.78)              | 7  | His 432 | 2.77 | 5 |         |      |   |         |      |
|       |                            |    | His 432 | 2.40 |   | His 372 | 5.97 |   |         |      |
|       |                            |    | Gln 363 | 1.74 |   | Leu 368 | 4.22 |   |         |      |
|       |                            |    | Ala 410 | 2.33 |   | Ala 410 | 5.01 |   |         |      |
|       |                            |    | Gln 413 | 2.06 |   | Leu 368 | 4.13 |   |         |      |
|       |                            |    | Asn 407 | 2.88 |   | Ala 410 | 3.40 |   |         |      |
|       |                            |    | Ala 410 | 2.71 |   |         |      |   |         |      |
|       | Syringic acid (5.21)       | 4  | Arg 596 | 1.78 | 4 | Ala 603 | 3.71 |   |         |      |
|       |                            |    | His 432 | 2.02 |   | Val 604 | 4.86 |   |         |      |
|       |                            |    | Gln 363 | 2.07 |   | Trp 599 | 4.99 |   |         |      |
|       |                            |    | His 600 | 2.72 |   | His 600 | 4.47 |   |         |      |
|       | Protocatechuic acid (6.12) | 5  | Arg 596 | 1.79 | 2 |         |      |   |         |      |
|       |                            |    | Arg 596 | 1.56 |   | Phe 359 | 5.14 |   |         |      |
|       |                            |    | Gln 363 | 2.26 |   | Ala 603 | 4.99 |   |         |      |
|       |                            |    | Gln 363 | 1.68 |   |         |      |   |         |      |
|       |                            |    | Gln 557 | 2.71 |   |         |      |   |         |      |
|       | Vanillic acid (5.52)       | 3  | Arg 596 | 1.56 | 2 | Phe 359 | 5.36 |   |         |      |
|       |                            |    | Arg 596 | 1.76 |   | Ala 603 | 5.09 |   |         |      |
|       |                            |    | Gln 363 | 1.90 |   |         |      |   |         |      |
|       | NDGA (7.50)                | 5  | His 372 | 2.86 | 6 | Phe 359 | 5.16 |   |         |      |
|       |                            |    | Arg 596 | 2.01 |   | Trp 599 | 5.32 |   |         |      |
|       |                            |    | Arg 596 | 2.13 |   | Leu 607 | 5.40 |   |         |      |
|       |                            |    | Ile 406 | 2.45 |   | Trp 599 | 5.48 |   |         |      |
|       |                            |    | His 600 | 2.06 |   | Ala 410 | 4.41 |   |         |      |
|       |                            |    |         |      |   | Ala 603 | 5.13 |   |         |      |
|       |                            |    |         |      |   |         |      |   |         |      |
| EGFR  | Rutin (10.69)              | 12 | H2O 78  | 2.44 | 6 |         |      | 1 | Lys 745 | 4.91 |
|       |                            |    | H2O 78  | 2.58 |   |         |      |   |         |      |
|       |                            |    | Asp 855 | 2.09 |   |         |      |   |         |      |
|       |                            |    | Asn 842 | 2.64 |   | Val 726 | 4.15 |   |         |      |



|     |                            |    |         |      |   |         |      |  |   |        |
|-----|----------------------------|----|---------|------|---|---------|------|--|---|--------|
|     |                            |    |         |      |   | Lys 745 | 3.98 |  |   |        |
|     |                            |    |         |      |   | Met 766 | 4.54 |  |   |        |
|     |                            |    |         |      |   | Leu 777 | 5.37 |  |   |        |
|     |                            |    |         |      |   | Leu 788 | 5.46 |  |   |        |
| IKK | Rutin (12.44)              | 14 | Asn 28  | 2.05 | 6 | Val 152 | 2.75 |  |   |        |
|     |                            |    | Cys 99  | 2.12 |   | Leu 21  | 4.95 |  |   |        |
|     |                            |    | Asp 103 | 1.96 |   | Tyr 98  | 5.49 |  |   |        |
|     |                            |    | Glu 149 | 2.12 |   | Leu 21  | 4.65 |  |   |        |
|     |                            |    | Arg 20  | 3.06 |   | Val 29  | 4.87 |  |   |        |
|     |                            |    | Glu 97  | 2.22 |   | Val 152 | 5.11 |  |   |        |
|     |                            |    | Asn 28  | 3.05 |   | Ile 165 | 4.89 |  |   |        |
|     |                            |    | Leu 21  | 2.71 |   | Leu 21  | 4.50 |  |   |        |
|     |                            |    | Lys 44  | 2.73 |   | Ala 42  | 4.72 |  |   |        |
|     |                            |    | Tyr 98  | 2.55 |   | Cys 99  | 5.13 |  |   |        |
|     |                            |    | Asp 103 | 2.11 |   | Ile 165 | 5.40 |  |   |        |
|     |                            |    | Asp 103 | 2.33 |   | Val 29  | 4.10 |  |   |        |
|     |                            |    | Leu 21  | 2.63 |   | Lys 44  | 5.40 |  |   |        |
|     |                            |    | Leu 21  | 2.57 |   | Ile 165 | 5.25 |  |   |        |
|     | Ferulic acid (8.83)        | 2  |         |      | 7 | Leu 21  | 4.16 |  | 1 | Met 96 |
|     |                            |    |         |      |   | Val 152 | 4.54 |  |   |        |
|     |                            |    | Glu 97  | 2.05 |   | Val 29  | 5.47 |  |   |        |
|     |                            |    | Asp 166 | 2.49 |   | Ala 42  | 3.90 |  |   |        |
|     |                            |    |         |      |   | Val 74  | 5.35 |  |   |        |
|     |                            |    |         |      |   | Val 152 | 4.89 |  |   |        |
|     |                            |    |         |      |   | Ile 165 | 4.49 |  |   |        |
|     | Protocatechuic acid (8.72) | 3  |         |      | 5 | Leu 21  | 5.19 |  | 1 | Met 96 |
|     |                            |    | Cys 99  | 2.03 |   | Val 29  | 5.43 |  |   |        |
|     |                            |    | Glu 97  | 1.96 |   | Ala 42  | 4.05 |  |   |        |
|     |                            |    | Cys 99  | 2.00 |   | Val 152 | 4.71 |  |   |        |
|     |                            |    |         |      |   | Ile 165 | 4.61 |  |   |        |
|     |                            |    |         |      |   |         |      |  |   |        |
|     | Sinapic acid (8.58)        | 3  |         |      | 5 | Val 29  | 2.76 |  | 1 | Met 96 |
|     |                            |    | Cys 99  | 2.11 |   | Lys 44  | 4.03 |  |   |        |
|     |                            |    | Glu 97  | 1.81 |   | Leu 94  | 5.26 |  |   |        |
|     |                            |    | Tyr 98  | 2.72 |   | Met 96  | 4.66 |  |   |        |
|     |                            |    |         |      |   | Ile 165 | 3.96 |  |   |        |
|     |                            |    |         |      |   |         |      |  |   |        |
